# Supplementary material for: Influenza Virus A/Anhui/1/2013 (H7N9) Replicates Efficiently in the Upper and Lower Respiratory Tracts of Cynomolgus Macaques
Source: PubMed Central journal article supplement — mBio. 2014 Aug 12;5(4):e01331-14. doi: 10.1128/mBio.01331-14 (PMC4145683; doi:10.1128/mbio.01331-14), 2014-08-12
Supplement: mbo004141938st4.pdf [file mbo004141938st4.pdf]

| Agilent Probe Identifier | GeneName           | H7N9-1 Lesion     | H7N9-2 Lesion     | H7N9-3 Lesion     | H7N9-4 Lesion     | Average Lung D3 | H7N9-1 Lung       | H7N9-2 Lung       | H7N9-3 Lung       | H7N9-4 Lung  | Average Lung D3 |
|--------------------------|--------------------|-------------------|-------------------|-------------------|-------------------|-----------------|-------------------|-------------------|-------------------|--------------|-----------------|
| A_01_P1693626            | DQ148102           | -1.5583498        | -0.33806103       | -1.1722437        | -0.8958236        | -0.991119533    | 0.15618154        | -0.42299873       | 0.53970975        | -0.543841    | -0.001885625    |
| A_01_P1831561            | ENSMUT00000018515  | 0.723715          | 0.38511288        | -0.4565428        | 0.8632745         | 0.607161295     | 0.20683031        | -0.1565215        | -0.1415031        | 0.059480786  | -0.041011157    |
| A_01_P017120             | ENSMUT00000005627  | -1.1228527        | -0.60833424       | -1.3018991        | -1.1995478        | -1.05815846     | -0.15675911       | -0.89454657       | 0.561075          | 0.12390147   | 0.342488235     |
| A_01_P1832131            | ENSMUT00000004115  | 0.6496145         | 0.409758          | 0.5609254         | 0.7681919         | 0.59712245      | 0.16568188        | -0.14362472       | 0.23558451        | -0.32974315  | -0.04707932     |
| A_01_P1721786            | FUBP3              | 0.7270009         | 1.045634          | No data available | No data available | 0.88631745      | 0.11679908        | 0.09779605        | 0.22873254        | -0.5697547   | -0.17051108     |
| A_01_P001392             | CBX5               | 0.44267932        | 0.82319844        | 0.9642476         | 0.62634003        | 0.714116348     | -0.3159258        | 0.60314924        | -0.50378096       | -0.040408164 | -0.272094562    |
| A_01_P1718676            | APOBEC3B           | 0.628966          | 1.1507916         | 2.0469577         | 1.6749887         | 1.375426        | -0.34911633       | 0.98078436        | -1.61123          | -0.12961091  | -0.870420455    |
| A_01_P175211             | ENSMUT00000000513  | -0.5335567        | -1.0023698        | -0.9263964        | -0.64730066       | -0.77740589     | -0.09155744       | 0.56792486        | -0.23116742       | -0.45966345  | -0.345415435    |
| A_01_P1673176            | INSR               | -1.657441         | -1.0388814        | -1.1687397        | -0.54162157       | -1.101670918    | -0.044637963      | -0.43009108       | 0.6525943         | -0.4814454   | 0.08557445      |
| A_01_P1766771            | LRRRC8B            | 0.5611467         | 0.2716022         | 1.1532767         | 1.0077952         | 0.7484552       | 0.05374313        | 0.26488668        | -0.4873987        | 0.06689608   | -0.21052131     |
| A_01_P1707551            | ENSMUT00000048176  | -0.3535427        | -0.85126466       | -0.6031734        | -1.1193944        | -0.73184379     | 0.11555268        | -0.61393267       | -0.05650943       | 0.38029617   | 0.16189337      |
| A_01_P1728026            | OPCML              | 2.626835          | No data available | No data available | 3.4209342         | 3.0238846       | -1.0458475        | 1.0123743         | No data available | -1.00459     | -1.00459        |
| A_01_P1704286            | ENSMUT0000003858   | 0.39658806        | 0.46988025        | 0.8364904         | 1.2835163         | 0.746618753     | 0.2053233         | -0.16216874       | -0.0900552        | 0.019897955  | -0.035078623    |
| A_01_P009874             | SLCSA9             | -1.7165378        | -1.607906         | -0.8891965        | No data available | -1.404546767    | -0.57690793       | No data available | 0.31809342        | 0.1149255    | 0.21650946      |
| A_01_P1805791            | JV712429           | -1.4483479        | -1.7264994        | -1.4772699        | -1.808959         | -1.58849995     | 0.12507035        | -1.3978283        | 0.07950383        | 0.5590359    | 0.319269865     |
| A_01_P1803876            | A_01_P1803876      | 1.1130668         | 0.24110946        | 0.7845783         | 0.52070415        | 0.664864678     | -0.088198155      | -0.061797686      | -0.328726         | 0.38404328   | 0.02765644      |
| A_01_P004269             | JV607252           | -0.8992825        | -0.65810853       | -0.5002271        | -0.4006148        | -0.614558233    | -0.089344         | -0.33660704       | -0.086766794      | 0.40764418   | 0.160438693     |
| A_01_P003626             | POLA2              | 0.66522956        | 0.42602438        | 1.2231238         | 1.2738138         | 0.897047885     | -0.16715913       | 0.38844988        | -0.57425916       | 0.17477454   | -0.19974231     |
| A_01_P1716276            | EGG5694            | -0.6687867        | -0.18983869       | -1.1990247        | -0.98307747       | -0.76027639     | -0.06547567       | -0.98137102       | 0.25372112        | 0.20245284   | 0.22808698      |
| A_01_P1703241            | ENSMUT00000021715  | -2.4168262        | -1.8783396        | -1.1178492        | -0.3848871        | -1.449475525    | No data available | -0.58313666       | 0.3042786         | 0.106400795  | 0.205339698     |
| A_01_P1720191            | ALS2               | -0.39836714       | -0.5612277        | -0.7259356        | -1.2681112        | -0.73841041     | 0.06068142        | 0.08429943        | -0.4517425        | 0.22120845   | -0.115267025    |
| A_01_P004000             | ENSMUT00000010049  | -0.6822704        | -0.6476724        | -0.8451986        | -0.65297264       | -0.70702851     | -0.3164819        | -0.3133578        | -0.008528843      | 0.483457     | 0.237464079     |
| A_01_P003474             | NOG                | 1.4153239         | 1.1049232         | 0.80415386        | 0.9384662         | 1.06571679      | -0.32883787       | 0.5418832         | 0.052405197       | -0.49175307  | -0.219673937    |
| A_01_P1752371            | ENSMUT00000041388  | -0.7751965        | -0.82307816       | -0.472699         | -1.0464774        | -0.797362765    | 0.2150951         | -0.268311         | 0.339122          | -0.426993916 | -0.04390858     |
| A_01_P1675331            | LOC170157          | -1.0690771        | -0.45343566       | -0.7172297        | -2.0664668        | -1.339052315    | -0.5504896        | -0.45343566       | 0.38495365        | 0.35737413   | 0.37116389      |
| A_01_P018522             | JV511848           | -0.55281234       | -0.91830736       | -0.41817042       | -1.0039816        | -0.72331793     | 0.08420144        | -0.076320         | 0.19467801        | 0.16956112   | 0.182117975     |
| A_01_P1671906            | IL6                | 0.8680354         | 0.857207          | 4.226861          | 3.2240875         | 2.294047725     | -2.4137816        | 1.5985558         | -1.9944743        | -0.9078544   | -0.154116435    |
| A_01_P1721766            | ENSMUT00000003209  | 0.60687655        | 0.71919775        | 0.454721          | 1.0702885         | 0.71277095      | -0.38221163       | 0.15311975        | No data available | 0.16441041   | -0.16441041     |
| A_01_P1811661            | A_01_P1811661      | 1.0186598         | No data available | 0.8866043         | 1.8922234         | 1.265829167     | 0.02005078        | No data available | -0.29173168       | 0.22914343   | -0.033996675    |
| A_01_P1763826            | ENSMUT00000028470  | 0.67995614        | 0.34961653        | 0.7855311         | 0.84640896        | 0.665378183     | 0.19904265        | -0.11685856       | 0.007953069       | -0.113503255 | -0.052774078    |
| A_01_P1763776            | PER3               | -0.46094275       | -0.87701184       | -0.6904412        | -1.0707803        | -0.774794023    | 0.20548812        | -0.120279156      | -0.13870679       | 0.026560757  | -0.056073017    |
| A_01_P1822886            | A_01_P1822886      | No data available | -1.4242733        | No data available | -1.3409431        | -1.3826082      | -0.008617769      | No data available | No data available | 0.008566597  | 0.008566597     |
| A_01_P1831476            | ENSMUT00000018751  | 0.7398739         | 0.78777356        | 1.7443924         | 0.90068454        | 0.7210661       | 0.35780942        | -0.19734816       | -0.13279857       | -0.098028965 | -0.115413768    |
| A_01_P1816711            | P2RX2              | No data available | -1.0605365        | -1.1143119        | No data available | -1.0874242      | -0.3518225        | 0.21020014        | 0.2998775         | -0.27139655  | 0.014204475     |
| A_01_P005959             | JV548223           | -1.2226901        | -1.0842229        | -0.7221859        | -1.2573204        | -1.071604825    | 0.101453654       | -0.9247102        | -0.114457768      | 0.56230867   | 0.232925495     |
| A_01_P1804691            | A_01_P1804691      | -1.1528509        | No data available | -1.2905188        | No data available | -1.22168485     | 0.30469945        | No data available | 0.09453714        | -0.5205293   | -0.21299608     |
| A_01_P020075             | LY75               | -1.0386237        | -0.55076104       | -0.8515917        | -1.1341456        | -0.89378051     | 0.052129366       | -0.32598752       | 0.4031058         | -0.24622065  | 0.078442575     |
| A_01_P1831595            | ENSMUT00000044187  | 0.6182777         | 0.31355587        | 1.1565309         | 0.59296364        | 0.670320278     | 0.17108943        | -0.18806635       | -0.092858195      | 0.08221922   | -0.005319488    |
| A_01_P1709541            | ENSMUT00000041703  | 0.7586699         | 0.44333398        | 0.7464525         | 0.8363271         | 0.620819058     | 0.19235137        | -0.25966933       | 0.03051122        | 0.001041495  | -0.051776357    |
| A_01_P1757301            | ENSMUT00000046584  | -0.77077985       | -0.93853813       | -0.1600846        | -1.1527511        | -0.75552942     | -0.46566898       | 0.16587368        | -0.13852513       | 0.31680837   | 0.08914162      |
| A_01_P1694621            | AY680531           | 1.0821875         | No data available | No data available | 1.1520475         | 1.11621175      | No data available | 0.3341763         | -0.37993214       | -0.03265162  | -0.211291785    |
| A_01_P1788231            | A_01_P1788231      | -0.9003212        | -1.0274898        | -2.800321         | -0.6872545        | -0.723744338    | 0.11285594        | -0.6144688        | 0.2777664         | 0.07470546   | 0.17623593      |
| A_01_P1790376            | YLP1M1             | -0.76807296       | -0.24323317       | -0.40244117       | -1.06332386       | -0.641221475    | 0.18406235        | -0.21394728       | 0.12832431        | 0.13088712   | -0.004481145    |
| A_01_P1671881            | TYROBP             | 0.7590293         | 0.41155884        | 0.40464887        | 0.81785893        | 0.598282885     | -0.15689754       | 0.31050974        | -0.5295907        | 0.2266947    | -0.151448       |
| A_01_P1804426            | A_01_P1804426      | -0.81002253       | -0.34909245       | -0.48411685       | -0.8846548        | -0.631971658    | 0.24075946        | -0.06872261       | 0.21048066        | -0.49852517  | -0.144202255    |
| A_01_P1754971            | ENSMUT000000042210 | 0.6018176         | 0.5041602         | 0.96634805        | 0.6521929         | 0.681129688     | 0.20318936        | 0.006276764       | 0.08359033        | -0.34959012  | -0.133040545    |
| A_01_P1804801            | A_01_P1804801      | 1.0664195         | 0.38283232        | 1.06391553        | 1.8629627         | 1.170307455     | -0.094848625      | -0.08544534       | -0.12763397       | -0.29599626  | 0.071181145     |
| A_01_P1797246            | A_01_P1797246      | -1.4297184        | No data available | -1.0648712        | -0.86805904       | -1.12086488     | -0.17990802       | -0.5503297        | 0.7868766         | -0.49605784  | -0.15440938     |
| A_01_P1755926            | ENSMUT00000041688  | -0.6491397        | -0.6827031        | -0.8939849        | -0.89682764       | -0.780663835    | -0.013315013      | -0.5128302        | 0.2502536         | 0.16211285   | 0.206183225     |
| A_01_P1739061            | HAS2               | 0.9520353         | 0.8913301         | 2.893726          | 2.9971976         | 1.93357225      | -1.5787143        | 1.290548          | -0.39225862       | -1.1294985   | -0.76087866     |
| A_01_P176906             | A_01_P176906       | -0.8364374        | -0.2863623        | -1.0411748        | -0.45083132       | -0.653701455    | -0.051809423      | -0.14231281       | -0.08032612       | 0.24289541   | 0.081284645     |
| A_01_P1753651            | ENSMUT00000027494  | 0.61865836        | 0.49686047        | 0.9292341         | 1.4955491         | 0.885075508     | 0.27564457        | 0.001600443       | -0.14754689       | -0.17531982  | -0.161433355    |
| A_01_P019082             | SELE               | 1.4182435         | 1.2490295         | 3.9553475         | 4.4243803         | 2.7617502       | -0.50328165       | 0.5396504         | 0.1742822         | -0.48908556  | -0.15740168     |
| A_01_P017707             | TMEM67             | -0.57498133       | -0.21936202       | -1.1255383        | -1.0269827        | -0.735966088    | -0.08061117       | -0.3889108        | 0.068974875       | 0.31227723   | 0.190626053     |
| A_01_P1675591            | SOCS1              | 1.3444866         | 0.76339173        | 0.944373          | 0.3885522         | 0.860200888     | 0.15166895        | 0.5965348         | -0.26485574       | -0.87624407  | -0.570549905    |
| A_01_P1726461            | ZNF214             | -1.1919111        | -1.4551423        | -1.8644346        | -0.9005683        | -1.353036575    | -0.32666785       | 0.0757721         | 0.35049912        | -0.18520261  | 0.082468255     |
| A_01_P1738906            | ENSMUT00000018768  | 0.6306312         | 0.4900956         | 1.1942071         | 0.8736155         | 0.78813735      | 0.21545894        | -0.26552066       | 0.084791034       | -0.07933476  | 0.002728137     |
| A_01_P1831606            | APOBEC3G           | 1.0993539         | 0.8443517         | 2.6455893         | 1.8128555         | 1.505287275     | -0.17089097       | 0.89662429        | -1.9059255        | -0.024542693 | -0.965239077    |
| A_01_P014420             | PTGIR              | 0.9549114         | 0.5348334         | 0.92934096        | 1.1126764         | 0.88294054      | 0.047653645       | 0.5595464         | -0.3197432        | -0.5247651   | -0.42225451     |
| A_01_P1800846            | A_01_P1800846      | -1.2851567        | -1.3928956        | -0.2434247        | -1.4057633        | -1.079535075    | -0.084275134      | -0.4955766        | 0.3704324         | 0.13981347   | 0.255123935     |
| A_01_P1714876            | ENSMUT000000043193 | 0.68138814        | 0.71472293        | 0.39680045        | 0.7293845         | 0.629794005     | 0.2060934         | -0.31097332       | 0.09209335        | -0.03735245  | -0.027359053    |
| A_01_P1810626            | A_01_P1810626      | 0.5191528         | 0.5726098         | 1.268094          | 0.6245104         | 0.74610076      | 0.07682424        | 0.007897116       | 0.3227732         | -0.5372461   | 0.10723645      |
| A_01_P1675281            | RHDF2              | 0.653577          | 0.8277665         | 0.5689006         | 0.902594          | 0.738209525     | -0.3631319        | 0.47747627        | -0.5272938        | 0.18772645   | -0.169783675    |
| A_01_P007561             | IRF1               | 1.1930792         | 0.08681701        | 1.9451163         |                   |                 |                   |                   |                   |              |                 |

|               |                   |                   |                   |                   |                   |              |                   |                   |                   |                   |              |
|---------------|-------------------|-------------------|-------------------|-------------------|-------------------|--------------|-------------------|-------------------|-------------------|-------------------|--------------|
| A_01_P1817246 | A_01_P1817246     | -1.1927264        | -0.55149305       | -1.0293304        | -0.6572117        | -0.857690388 | 0.012214466       | -0.3761233        | 0.21114377        | 0.088666946       | 0.149905108  |
| A_01_P005185  | LOC700014         | -2.595675         | -1.637883         | -2.4762547        | -2.1617956        | -0.62818992  | 0.6346087         | -2.1887633        | 0.64183205        | -0.69683594       | -0.027501945 |
| A_01_P1771676 | A_01_P1771676     | No data available | 1.4894283         | 1.3510581         | 2.3215091         | 1.708925167  | 0.16167634        | 0.1040550015      | No data available | -0.112671435      | -0.112671435 |
| A_01_P1789291 | JV507254          | -0.61866224       | -0.3892056        | -0.8904454        | -1.164584         | -0.76571431  | 0.016716313       | -0.14590087       | 0.31104356        | -0.44040748       | -0.06468196  |
| A_01_P1705201 | ENSMMU00000038497 | -0.9371266        | -0.784872         | -0.8945064        | -0.37917498       | -0.749323795 | -0.2822031        | -0.003823421      | 0.41724256        | -0.2430798        | 0.08708138   |
| A_01_P1772881 | JV631301          | 0.6085755         | 0.7479227         | 1.0290156         | 1.3501881         | 1.001425475  | 0.18229614        | 0.7181261         | -0.85497683       | -0.58339083       | -0.71918383  |
| A_01_P1751056 | ENSMMU00000039474 | -0.5188882        | -0.4759622        | -1.048083         | -1.4233016        | -0.86655875  | -0.3101227        | -0.6024238        | 0.2904959         | 0.39145967        | 0.340977785  |
| A_01_P1756371 | ENSMMU00000010699 | 0.7536029         | 0.44277978        | 0.59595726        | 0.7175925         | 0.618379798  | 0.19758417        | -0.2525994        | 0.059138626       | -0.04066518       | 0.009236723  |
| A_01_P1812926 | A_01_P1812926     | -0.5687757        | -0.8988155        | -0.29068738       | -0.7544811        | -0.62818992  | 0.027266696       | -0.29976466       | -0.02099111       | 0.2424259         | 0.110717395  |
| A_01_P1693106 | TRIB1             | 0.300108          | 0.48618492        | 1.3298779         | 1.5064373         | 0.90565203   | -0.50572556       | 0.5648047         | -0.2331846        | -0.043677643      | -0.138431122 |
| A_01_P1810691 | A_01_P1810691     | -0.12106787       | -0.96938306       | -0.7660682        | -1.1796137        | -0.75903208  | 0.0348735         | -0.35067046       | 0.22128531        | 0.036385935       | 0.128835623  |
| A_01_P1823371 | ENSMMU00000025957 | -0.57990384       | -0.63700783       | -1.4685967        | -0.9673961        | -0.913226118 | 0.31707016        | -0.077566676      | -0.329646         | 0.015519864       | -0.157063068 |
| A_01_P1801681 | LOC698852         | -0.98579204       | -1.3250812        | No data available | No data available | -1.15543662  | -0.49566483       | 0.026402034       | 0.3474347         | No data available | 0.3474347    |
| A_01_P000230  | LOC703104         | -0.7368274        | -0.50229883       | -0.3849603        | -0.96014667       | -0.646067233 | 0.16403317        | -0.4674386        | 0.27582115        | -0.08061517       | 0.09760299   |
| A_01_P017996  | ICOS              | 0.4025808         | 0.42952192        | 0.66371757        | 0.8217248         | 0.579386273  | -0.18184364       | 0.12279562        | 0.13963206        | -0.10786959       | 0.015881235  |
| A_01_P1833696 | A_01_P1833696     | -1.2186935        | No data available | -1.5391457        | -1.6251824        | -1.4610072   | -0.45847535       | No data available | 0.047911365       | 0.30856776        | 0.178239563  |
| A_01_P1671961 | FAS               | 0.72163355        | 0.2900969         | -1.5795194        | 1.2071002         | 0.873837513  | -0.10452382       | 0.44481623        | 0.13963206        | -0.07542383       | -0.27117665  |
| A_01_P1680946 | SORCS1            | No data available | -2.6089907        | No data available | -2.4678376        | -2.53841415  | No data available | No data available | 0.0862519         | -0.09173851       | -0.002743305 |
| A_01_P1754396 | DCAF16            | -0.92937654       | -0.4529497        | -0.5579696        | -0.71013236       | -0.660350868 | -0.056032155      | -0.1388135        | 0.47593006        | -0.43632692       | 0.01980157   |
| A_01_P1794106 | PSG2              | 0.72722114        | 0.5324999         | No data available | 0.9519129         | 0.7546314    | No data available | -0.0600809        | No data available | 0.057678457       | 0.057678457  |
| A_01_P1730801 | LOC700636         | -0.46973085       | -0.77913105       | -1.4608533        | -0.63509136       | -0.83620164  | -0.23944592       | -0.207169091      | 0.24489468        | 0.13971527        | 0.192304975  |
| A_01_P1783041 | LOC702444         | 0.5238061         | 0.678043          | 0.4423794         | 0.6970506         | 0.585319775  | -0.35846925       | 0.4870034         | -0.08276971       | -0.19390798       | -0.138388845 |
| A_01_P1746961 | ENSMMU00000028497 | No data available | 0.9933669         | 1.1315804         | 0.4761122         | 0.867019833  | -0.12572937       | No data available | 0.4071875         | -0.4009464        | 0.00312055   |
| A_01_P1755866 | FREM3             | -1.7894306        | -2.255498         | No data available | No data available | -0.2224643   | -0.75953984       | 1.0273293         | -0.024633048      | -1.3658825        | -0.695257774 |
| A_01_P1831881 | ENSMMU00000043694 | 0.6732766         | 0.66724885        | 0.6205749         | 0.7350185         | 0.674029713  | 0.14541335        | -0.1005517        | 0.14734049        | -0.22811373       | -0.04038662  |
| A_01_P007248  | SERTAD1           | 0.32817212        | 0.2431625         | 0.97388756        | 1.0623599         | 0.65189552   | -0.14742354       | 0.264367          | 0.15653494        | -0.35582465       | -0.099644855 |
| A_01_P1735426 | LOC713452         | -2.1518433        | -2.3238523        | -0.8495695        | -2.3236444        | -1.912174238 | -0.42044145       | No data available | 0.7110586         | -0.69946826       | 0.00579517   |
| A_01_P017589  | GLB1L             | -0.62894326       | -0.16590138       | -1.080808         | -0.68092716       | -0.64021495  | -0.21217385       | -0.33743918       | 0.18241148        | -0.27565125       | 0.229031365  |
| A_01_P1670916 | LST1              | 0.78839284        | 0.49176553        | 1.1021409         | 1.0347053         | 0.854251143  | -0.24244061       | 0.4671687         | -0.5668827        | 0.13385071        | -0.216515995 |
| A_01_P1709981 | ENSMMU00000004542 | -0.44339842       | -1.0643836        | -0.30474675       | -1.1721672        | -0.746173993 | 0.03076933        | -0.14830361       | 0.4147389         | -0.10482701       | 0.154959905  |
| A_01_P1738716 | TP53INP1          | -0.54191095       | -0.59685373       | -1.630226         | -0.740953         | -0.62748842  | 0.058161546       | 0.19041745        | -0.27355292       | -0.137788088      | -0.143670504 |
| A_01_P1798981 | ENSMMU00000001064 | -1.0748817        | -1.1279268        | -1.6422834        | No data available | -1.2816923   | -0.23840311       | No data available | 0.12683203        | 0.08464054        | 0.105736295  |
| A_01_P1689291 | KLH2L4            | -0.73340476       | -0.8498189        | -1.50293694       | -0.8951281        | -0.745297175 | 0.2584286         | -0.41379896       | 0.19094637        | -0.13341889       | 0.02876374   |
| A_01_P1820666 | LOC712062         | 3.0759556         | 1.028347          | 0.4098286         | 1.0082603         | 1.630622875  | -0.91545886       | 0.2610703         | No data available | 0.36507136        | 0.04670136   |
| A_01_P1827641 | A_01_P1827641     | -0.9747827        | -0.42366064       | -0.49754643       | -0.9341623        | -0.707538018 | -0.082813784      | -0.12784791       | 0.44816014        | -0.36533162       | 0.04141441   |
| A_01_P1769246 | ATF3              | 0.6770242         | 0.5357394         | 2.3379898         | 1.7748161         | 1.3313988    | 0.21633053        | 0.72315115        | -0.5789214        | -0.9490396        | -0.7639805   |
| A_01_P005806  | JV505143          | -1.6717645        | -1.2695508        | -0.70171975       | -1.4874852        | -1.285148063 | 0.12137384        | -0.97136295       | 0.66953725        | -0.30108267       | 0.18422729   |
| A_01_P1824026 | A_01_P1824026     | -0.9688304        | -1.5872053        | -0.93777263       | -1.5640076        | -1.254453983 | 0.1801831         | -0.10050177       | -0.15558903       | 0.07341413        | -0.04108745  |
| A_01_P018147  | JU335156          | -0.62830406       | -0.28599173       | -0.9015942        | -0.7032326        | -0.629780648 | 0.0481406         | -0.3385222        | 0.21887256        | 0.016344989       | 0.117608775  |
| A_01_P017230  | LOC702798         | -0.7843767        | -0.2386112        | -1.0033306        | -0.5213745        | -0.63686073  | -0.268131         | -0.36872023       | 0.27282552        | 0.29168335        | 0.259754435  |
| A_01_P1789856 | A_01_P1789856     | -0.70574373       | -0.11471804       | -1.0924085        | -0.7260213        | -0.659722846 | 0.27629027        | -0.19648314       | 0.05841894        | -0.19276911       | -0.067175608 |
| A_01_P006106  | TYMP              | 0.81381184        | 0.62281954        | 0.5536458         | 0.4211589         | 0.60285902   | 0.05192582        | 0.39097515        | -0.34154367       | -0.21277414       | -0.277158905 |
| A_01_P1793961 | A_01_P1793961     | 1.235353          | No data available | 1.788838          | 2.7961154         | 1.8701174    | -0.28278023       | 0.4076823         | No data available | -0.23202059       | -0.23202059  |
| A_01_P1762536 | LOC714139         | -1.0031841        | -0.7398523        | -0.7111415        | -0.5622229        | -0.75409345  | 0.032929707       | 0.15821767        | 0.21111594        | -0.50753886       | -0.148221446 |
| A_01_P1735431 | DHX7              | -0.65407556       | -0.47857258       | -1.4263774        | -0.64852124       | -0.801886695 | 0.092537954       | -0.24203771       | -0.0939894        | -0.20232552       | 0.05462306   |
| A_01_P010018  | JV725169          | -1.0716766        | -1.3881885        | -0.63280767       | -0.7995267        | -0.972018143 | 0.2165986         | -0.8391523        | 0.009680172       | -0.34513775       | 0.177408961  |
| A_01_P017614  | A_01_P017614      | -0.48805895       | -0.63944006       | -0.867862         | -1.190441         | -0.796500603 | -0.10801795       | -0.11048134       | 0.35739547        | -0.20500337       | 0.07196005   |
| A_01_P1724386 | ZNF658            | -1.3858349        | -0.74714434       | -0.87112164       | -0.98354629       | -0.996938935 | -0.088432275      | -0.6790379        | 0.5525856         | -0.046679623      | 0.252952989  |
| A_01_P015966  | JV482459          | -0.5779332        | -0.25163892       | -1.0952633        | -1.1249286        | -0.76258033  | -0.08164754       | -0.4011291        | 0.3361581         | 0.050141428       | 0.193149764  |
| A_01_P1736796 | ZC3H6             | -0.29174173       | -0.49583167       | -0.90716094       | -0.8384035        | -0.63328446  | 0.2218865         | -0.23579668       | -0.011440555      | -0.010969894      | -0.011205225 |
| A_01_P1762216 | CAV2              | -0.6092315        | -0.35785055       | -0.96385234       | -0.96691954       | -0.724463708 | 0.32535845        | -0.27612913       | 0.3052298         | -0.54689264       | -0.12058483  |
| A_01_P1721841 | ENSMMU00000046955 | 0.6535603         | 0.19526796        | 0.9633904         | 0.5382806         | 0.587762315  | 0.2596144         | -0.20269523       | -0.042013604      | -0.038910963      | -0.040462284 |
| A_01_P1712476 | ENSMMU00000039385 | 0.5266615         | 0.45538843        | 0.8050662         | 0.58021563        | 0.593334103  | 0.16318822        | -0.004257515      | 0.004031383       | -0.18378633       | -0.089877424 |
| A_01_P1817051 | A_01_P1817051     | No data available | 0.73164976        | No data available | 0.9178515         | 0.82475063   | -0.10806031       | No data available | No data available | 0.10052744        | 0.10052744   |
| A_01_P1707216 | ENSMMU00000048261 | 0.6809307         | 0.39222765        | 0.6376956         | 0.59198004        | 0.575708498  | 0.22179168        | -0.20385262       | 0.06295309        | -0.11874551       | -0.02789621  |
| A_01_P1807686 | A_01_P1807686     | -2.08754          | No data available | 0.6376956         | -2.1145062        | -2.1010231   | 0.2628768         | -0.12423584       | -0.18010081       | No data available | -0.18010081  |
| A_01_P008272  | A_01_P008272      | -1.5680774        | No data available | -1.6989323        | -1.715197         | -1.660735567 | -0.2572655        | -0.01207093       | 0.7198797         | -0.93066907       | -0.105394685 |
| A_01_P1787181 | A_01_P1787181     | -1.3131375        | -0.4362222        | -0.6138796        | -0.37705517       | -0.685073618 | -0.23489352       | 0.02414188        | -0.08652052       | -0.2588337        | 0.083181425  |
| A_01_P1787176 | A_01_P1787176     | -0.7960524        | -1.6511124        | -0.63717365       | -0.8461698        | -0.982627063 | 0.12515503        | -0.7248509        | 0.4170866         | -0.045302074      | 0.185892263  |
| A_01_P008584  | PROK2             | No data available | No data available | 3.6655133         | 3.4186046         | 3.54205895   | -1.3650419        | No data available | -0.0926769        | 0.3253094         | 0.3253094    |
| A_01_P1815291 | A_01_P1815291     | No data available | 1.040108          | 0.8620303         | 0.64150983        | 0.84789271   | 0.12696767        | -0.007323779      | No data available | -0.13120626       | -0.13120626  |
| A_01_P1763846 | ENSMMU00000047597 | 0.671079          | 0.43275163        | 0.742023976       | 0.83280826        | 0.664219663  | 0.14705645        | -0.03832661       | 0.08149709        | -0.15333575       | -0.03591933  |
| A_01_P1720816 | ARMC9             | -0.894676         | -0.6079802        | -0.6777296        | -1.2629507        | -0.860834125 | -0.42902318       | -0.43407795       | 0.14606639        | 0.49624318        | 0.321144785  |
| A_01_P1832356 | ENSMMU00000014305 | 0.3815349         | 0.45253146        | 0.56834556        | 0.5683238         | 0.58223393   | 0.22322634        | 0.0741926         | 0.11466454        | -0.2540306        | 0.02188830   |
| A_01_P1727261 | ENSMMU00000032668 | 0.77609384        | 0.566872          | 0.63475677        | 0.95183563        | 0.733066805  | 0.26319197        | -0.100641236      | -0.040126886      | -0.16055408       | -0.100340483 |
| A_01_P1701426 | PGAM2             | -1.4711655        | -5.09E-01         | -1.0156133        | -1.1704885        | -1.174348715 | -0.3180572        | -0.4785504        | -7.53E-04         | -0.5625242        | 0.282750618  |
| A_01_P012513  | SERPINB2          | 0.58316517        | 1.070746          | 2.098468          | 2.2859816         | 1.644590193  | -0.1072425        | 0.96202904        | -0.8277712        | 0.018831795       | -0.404469703 |
| A_01_P1735736 | ENSMMU00000030939 | -0.96376014       | -0.64424473       | -0.90552455       | -0.41539434       | -0.73233094  | 0.1220627         | -0.6151974        | 0.13838024        | -0.12186884       | -0.17512454  |
| A_01_P1694126 | DQ148238          | 0.72043455        | 0.24952278        | 0.71973515        | 1.1298081         | 0.704875145  | 0.062327985       | 0.32422712        | -0.6704059        | 0.10504416        | -0.28268087  |
| A_01_P1765121 | RNF19B            | 0.9102206         | 0.5517821         | 2.145826          | 1.8663862         | 1.368553725  |                   |                   |                   |                   |              |

|               |                   |                   |                   |                   |                   |              |                   |                   |                   |                   |              |
|---------------|-------------------|-------------------|-------------------|-------------------|-------------------|--------------|-------------------|-------------------|-------------------|-------------------|--------------|
| A_01_P1707186 | LOC700587         | -0.67285967       | -0.5437367        | -1.0513793        | -1.0463552        | -0.828582718 | 0.33138224        | -0.045211837      | 0.03590003        | -0.4199745        | -0.192037235 |
| A_01_P1831676 | ENSMMU00000026548 | 0.655167          | 0.55089176        | 0.9348216         | 0.8811889         | 0.755517315  | 0.1203942         | -0.098394126      | 0.13836259        | -0.1873117        | -0.024474555 |
| A_01_P1716646 | ENSMMU00000044725 | 0.6331215         | 0.45508826        | 0.7548402         | 0.75358915        | 0.649159778  | 0.1683949         | -0.08225881       | -0.1477354        | 0.041171674       | -0.053281863 |
| A_01_P1768186 | LOC719403         | No data available | -1.6552757        | -1.2863158        | No data available | -1.47079575  | -0.17198035       | -0.05374042       | 0.20030521        | No data available | 0.20030521   |
| A_01_P1742866 | ENSMMU00000041425 | 0.52392584        | 0.31257513        | 1.1690185         | 0.5709679         | 0.644121843  | 0.2626787         | -0.34701338       | 0.034390107       | -0.01426816       | 0.010071646  |
| A_01_P002144  | JV702462          | -1.0937604        | -0.40452042       | -0.84885013       | -1.5041863        | -0.962829313 | -0.13052231       | -0.5917515        | 0.45951118        | 0.06795505        | 0.263551165  |
| A_01_P014535  | LOC709341         | -1.0954473        | -0.9465626        | -1.1173484        | -1.62947          | -1.197207075 | -0.7378131        | -0.5104901        | 0.3158472         | 0.53966563        | 0.42775175   |
| A_01_P1741176 | ENSMMU00000047915 | -1.8964407        | No data available | No data available | -1.3591869        | -1.6278138   | No data available | -0.28190774       | 0.50824755        | -0.40511551       | 0.05156602   |
| A_01_P1773816 | CTSK              | -1.2312515        | -0.6534706        | -0.52883995       | -0.8205499        | -0.808527988 | -0.13963543       | -0.25781405       | 0.5402178         | -0.31885588       | 0.11068096   |
| A_01_P1816261 | A_01_P1816261     | -1.1397138        | -1.1096447        | -0.96565795       | -1.3370818        | -1.138204563 | -0.39871138       | -0.69590956       | 0.17430154        | 0.5808396         | 0.37757507   |
| A_01_P1761801 | PKDK              | -0.702988         | -0.7195482        | -0.7581265        | -1.2483767        | -0.85725985  | 0.36918822        | -0.6094457        | 0.15740646        | 0.029288598       | 0.03226024   |
| A_01_P007635  | IQCK              | -0.7411847        | -0.35749686       | -0.97107416       | -0.5208908        | -0.64766163  | -0.002246724      | -0.09034282       | 0.0396256         | 0.04880746        | 0.04421653   |
| A_01_P1812101 | A_01_P1812101     | 1.1482468         | 0.5929598         | 3.0083828         | 2.8699355         | 1.904881225  | -1.1545653        | 1.1182678         | -0.31656852       | -0.7934591        | -0.55501381  |
| A_01_P1743096 | ENSMMU00000041342 | 0.5111521         | 0.7651827         | 0.6595931         | 0.8149315         | 0.68771485   | 0.340114          | 0.0784215         | -0.3464854        | -0.16523743       | -0.255861415 |
| A_01_P1769691 | ENSMMU0000002199  | 0.6760278         | 0.34746337        | 0.5924467         | 0.7500277         | 0.591491393  | 0.18232873        | -0.17130691       | -0.06134548       | 0.026981628       | -0.017819326 |
| A_01_P016084  | PON1              | -0.7159665        | No data available | -0.7014618        | -1.0388807        | -0.687196667 | -0.63365406       | 0.2886605         | 0.11897544        | 0.067734025       | 0.093354733  |
| A_01_P1759256 | ENSMMU00000045371 | -0.6955478        | -0.21440555       | -0.8226034        | -0.9769286        | -0.677371338 | -0.024747904      | -0.21342984       | 0.22919625        | -0.025703318      | 0.101746466  |
| A_01_P1687306 | TNFAIP8           | 0.9761313         | 0.60719424        | 1.0091911         | 1.1282047         | 1.030362335  | -0.20952304       | 0.52667475        | -0.97553253       | 0.2461285         | -0.364702375 |
| A_01_P1824041 | A_01_P1824041     | No data available | No data available | 2.3331304         | 1.5642409         | 1.94868565   | No data available | -1.009233         | 0.7837523         | 0.25685036        | 0.32210313   |
| A_01_P1808191 | ENSMMU00000046683 | 0.9280467         | 0.5642406         | 0.8420453         | 1.2199137         | 0.888561575  | -0.14268203       | 0.7927585         | -0.45514566       | -0.6612137        | -0.55817968  |
| A_01_P1727326 | ENSMMU00000009798 | -0.6964929        | -0.69373757       | -0.48098794       | -0.61814725       | -0.622341415 | 0.078484744       | -0.32046944       | -0.19901156       | -0.34725165       | 0.07412005   |
| A_01_P002728  | LOC714534         | 0.644561          | 0.50408953        | 1.3142729         | 1.1553626         | 0.994639008  | -0.28569084       | 0.4085572         | -0.04789216       | -0.17379466       | -0.1108341   |
| A_01_P1789586 | A_01_P1789586     | -0.46350306       | -0.912083         | -1.0207661        | -0.7744791        | -0.792707815 | 0.4489573         | -0.08400687       | -0.2529332        | -0.23249695       | -0.241715075 |
| A_01_P1710591 | ENSMMU00000041090 | 0.8742224         | 0.39702487        | 0.5170852         | 0.76896065        | 0.63932328   | 0.3299095         | -0.29158616       | -0.19096053       | 0.070443965       | -0.060258283 |
| A_01_P1830156 | LOC702002         | 0.35706723        | 1.1730382         | 1.143818          | 1.3421265         | 1.004012483  | -0.5324901        | 0.79041463        | -0.9286812        | 0.0750501         | -0.42658805  |
| A_01_P1789496 | A_01_P1789496     | -0.82121575       | -0.4414257        | -1.0327163        | -0.7364319        | -0.757947413 | 0.028332544       | -0.40827885       | 0.41881785        | -0.16842476       | 0.125196454  |
| A_01_P1785251 | JU492914          | -0.9835154        | -1.2015013        | -1.9230703        | -1.185567         | -1.3234135   | 0.2478454         | -1.0017653        | 0.22170526        | 0.19795094        | 0.2098281    |
| A_01_P1811021 | A_01_P1811021     | 0.7065325         | No data available | 0.664785753       | 0.71905506        | 0.647485753  | 0.16124123        | -0.37092888       | No data available | 0.14856534        | 0.14856534   |
| A_01_P1764866 | THEM152           | 0.56165606        | 0.6337365         | 0.913186          | 0.48047435        | 0.647196378  | -0.47251752       | 0.5169775         | -0.1576345        | -0.071200095      | -0.114417298 |
| A_01_P1831361 | ENSMMU00000048218 | 0.50019914        | 0.22982451        | 1.1615927         | 0.5043451         | 0.598990363  | 0.16642684        | -0.34110627       | 0.09943691        | 0.024225594       | 0.061831262  |
| A_01_P1814136 | A_01_P1814136     | 1.5397631         | 0.91721946        | No data available | 1.2917319         | 1.251385487  | 0.23700027        | -0.32359457       | -0.18995854       | 0.19632447        | 0.003164315  |
| A_01_P1718246 | ENSMMU00000044115 | 1.0747297         | 0.71556676        | 0.19906376        | 0.4460749         | 0.608859003  | 0.040606786       | 0.12220318        | -0.13794746       | -0.037640896      | -0.087794178 |
| A_01_P1801766 | A_01_P1801766     | -1.1057665        | -0.8017156        | No data available | No data available | -0.95374105  | -0.41378555       | 0.28151268        | -0.19886883       | 0.217413          | 0.009272085  |
| A_01_P1793256 | A_01_P1793256     | 0.56790805        | 0.5660502         | 0.84054494        | 0.4209653         | 0.596505873  | -0.16918473       | 0.411411273       | 0.020134397       | -0.3834368        | -0.181651202 |
| A_01_P015102  | ENSMMU00000030918 | 0.7348923         | 0.6551811         | 0.91523904        | No data available | 0.76846748   | -0.2841556        | 0.06894544        | -0.035260957      | 0.20661034        | 0.085674692  |
| A_01_P1784726 | JV582016          | 1.4170439         | 0.52407837        | 0.3219298         | 1.3563286         | 0.904804168  | 0.49076876        | -0.293653         | -0.3727989        | 0.009619525       | -0.181589688 |
| A_01_P1743636 | ENSMMU00000028056 | 0.2628326         | 0.73952407        | 0.92856103        | 1.0166204         | 0.736882275  | -0.56676656       | 0.62324435        | -0.36042225       | 0.080057888       | -0.176182181 |
| A_01_P1760346 | ENSMMU00000042563 | 0.68506527        | 0.6707148         | 1.2044482         | 1.0940591         | 0.913580843  | 0.23446517        | -0.038044584      | 0.109252006       | -0.37495497       | -0.132851482 |
| A_01_P002478  | PHF17             | -0.5190055        | -0.53661406       | -0.64082354       | -1.0174482        | -0.678472825 | 0.09662444        | -0.25449422       | 0.37767416        | -0.33423516       | 0.0217195    |
| A_01_P1719471 | COB11             | -0.84006137       | -0.72631794       | -0.5914733        | -0.5854282        | -0.685820203 | -0.21338229       | -0.5419096        | 0.40071192        | 0.17691895        | 0.288815495  |
| A_01_P1755271 | ENSMMU00000022971 | -0.6616986        | -0.082484506      | -0.9143421        | -0.85008115       | -0.627151589 | -0.19367567       | -0.023840243      | 0.1504596         | 0.045570042       | 0.098014821  |
| A_01_P1732116 | ENSMMU00000010343 | -1.1372888        | -0.4171641        | -0.8905964        | -0.51652323       | -0.74039315  | 0.16621566        | -0.49697644       | 0.43077433        | -0.29430002       | 0.071373655  |
| A_01_P1774516 | A_01_P1774516     | 0.99359465        | 0.7440979         | 1.3355736         | 2.0721128         | 1.286344738  | -0.7204723        | 0.74057794        | -1.4380885        | 0.4363753         | -0.5008566   |
| A_01_P1832251 | ENSMMU00000039802 | 0.6028779         | 0.27027893        | 1.1327757         | 0.5921641         | 0.649519658  | 0.18011357        | -0.06466002       | 0.13402052        | -0.29292855       | -0.081254015 |
| A_01_P1730941 | ENSMMU00000042557 | 0.7862641         | 0.55141735        | 0.6611784         | 0.7668175         | 0.641491338  | 0.21118903        | -0.1620906        | -0.009090258      | -0.06656309       | -0.07826674  |
| A_01_P1703651 | ENSMMU00000024809 | 0.7820231         | 0.80832607        | 0.731445          | 1.0635176         | 0.846777943  | -0.24346739       | 0.32754073        | -0.13117772       | -0.018397009      | -0.074787365 |
| A_01_P1714246 | PTPN2             | 0.61551607        | 0.2567195         | 1.0028949         | 0.98570377        | 0.71520856   | -0.4237536        | 0.32636198        | -0.19714457       | 0.15780243        | -0.01103107  |
| A_01_P1716496 | ENSMMU00000044838 | 0.6738173         | 0.63416463        | 1.1986018         | 0.9357865         | 0.860585595  | 0.26226163        | -0.293846         | 0.18976636        | -0.24410786       | -0.02717075  |
| A_01_P1709076 | EFCA85            | 0.54030865        | 0.29102987        | 0.85753363        | 0.8943328         | 0.645801238  | 0.448E-04         | -1.28E-01         | 0.17151356        | -0.06139187       | 0.055060845  |
| A_01_P1722711 | ENSMMU00000046463 | 0.7681894         | 0.5349314         | 0.6962803         | 0.815246          | 0.702161775  | 0.32737392        | -0.1357703        | -0.01237401       | -0.24531156       | -0.128842785 |
| A_01_P1724007 | GARNL3            | -1.6074754        | -1.2214893        | -1.1688615        | -2.0013213        | -1.499286875 | 0.1440906         | -1.3769108        | 0.5657275         | -0.02435006       | 0.30403878   |
| A_01_P1756626 | ENSMMU00000001285 | -0.40953928       | -0.641852         | -0.9227474        | -0.8259308        | -0.700017305 | 0.085079014       | -0.60367167       | 0.17100343        | 0.20831221        | 0.18965782   |
| A_01_P1831751 | ENSMMU00000005182 | 0.7935158         | 0.1698921         | 0.4278664         | 0.47670913        | 0.653745858  | 0.44237724        | 0.09776259        | -0.18962862       | -0.5265464        | -0.35808751  |
| A_01_P1822631 | JV457827          | -0.20203783       | -0.85536975       | -0.7092427        | -0.6489755        | -0.603906445 | -0.017529892      | -0.140164         | -0.055299018      | 0.19257577        | 0.068638376  |
| A_01_P1795171 | A_01_P1795171     | -0.5391978        | -0.45629647       | -0.9532447        | -0.9301489        | -0.719721968 | -0.044364724      | -0.39810264       | 0.22074217        | 0.14547493        | 0.18310855   |
| A_01_P1832176 | ENSMMU00000040569 | 0.7130462         | 0.571265          | 0.3292182         | 1.0154558         | 0.6572463    | 0.21836442        | -0.19219671       | 0.021320762       | -0.07948336       | -0.029058787 |
| A_01_P1780041 | JV715136          | -0.89157283       | -0.7275949        | -0.62616146       | -0.5264259        | -0.692938773 | -0.2168174        | -0.12328148       | 0.24533916        | 0.051121466       | 0.148230313  |
| A_01_P1730336 | SECS3B            | -0.97991735       | -0.19666238       | -1.3134129        | -1.0501771        | -0.873792433 | -0.46616685       | -0.0803784        | -0.12893562       | 0.10611684        | 0.18634061   |
| A_01_P018600  | HAGHL             | -0.3857014        | -0.48208556       | -0.85827076       | -1.128491         | -0.71363718  | -0.3368122        | -0.32186776       | 0.15950413        | 0.36879578        | 0.264149955  |
| A_01_P1816301 | A_01_P1816301     | -1.2918015        | -0.6433448        | -1.4198959        | -1.0429513        | -1.099498375 | -0.4070535        | -0.8911361        | 0.40613595        | 0.46625313        | 0.0619454    |
| A_01_P1754566 | WDR19             | -0.46801645       | -0.24469073       | -0.9480804        | -0.997971         | -0.664691895 | 0.017768415       | -0.32014304       | 0.120673895       | 0.13682896        | 0.128678428  |
| A_01_P1761886 | AKAP9             | -0.42860413       | -0.85793126       | -0.5010425        | -1.1249852        | -0.728140773 | 0.33136515        | -0.43896487       | 0.18528886        | 0.16737373        | -0.00760765  |
| A_01_P1766191 | ENSMMU00000014568 | -3.0053747        | -2.980702         | No data available | No data available | -2.99303835  | -1.443729         | No data available | 0.24484475        | 0.53348243        | 0.38916359   |
| A_01_P1747366 | ENSMMU00000040705 | 0.46018052        | 0.6136778         | 0.68190337        | 0.7274668         | 0.621483373  | 0.13346413        | -0.04609407       | 0.2059935         | -0.3565313        | -0.0752689   |
| A_01_P1769876 | ALG8              | 0.63935196        | 0.5363554         | 1.0756197         | 0.8947577         | 0.77527569   | -0.14156304       | 0.12230241        | -0.18556909       | -0.106059074      | -0.145810032 |
| A_01_P001021  | JV663077          | 0.5136094         | 0.16984673        | 1.0866688         | 0.9640861         | 0.683557508  | -0.010774083      | 0.2307656         | -0.3029098        | 0.033320155       | -0.134792823 |
| A_01_P1702676 | IZUM04            | -1.7676655        | -1.1543124        | -1.2471343        | -1.7629828        | -1.484601    | 0.06633904        | No data available | 0.121078946       | -0.208568         | -0.043744527 |
| A_01_P1806696 | JV679161          | -0.62707967       | -0.63773734       | -0.8217666        | -0.9678063        | -0.763594078 | 0.29930726        | -0.52911973       | 0.054417018       | 0.05384785        | 0.054132434  |
| A_01_P1800371 | A_01_P1800371     | 0.5900215         | 0                 |                   |                   |              |                   |                   |                   |                   |              |

|               |                    |                   |                  |                  |                  |              |                  |                  |                  |              |              |
|---------------|--------------------|-------------------|------------------|------------------|------------------|--------------|------------------|------------------|------------------|--------------|--------------|
| A_01_P1711241 | RGS11              | 1.0178431         | 0.7196352        | 2.5968688        | 2.6023808        | 1.734181975  | -0.122827284     | 0.39874056       | -0.288831        | -0.082083575 | -0.185457288 |
| A_01_P013287  | GPR75              | -0.4326796        | -1.713735        | -1.293916        | -0.8396603       | -1.069866625 | No data availab  | -0.19704767      | -0.214474        | -0.058594037 | -0.04819183  |
| A_01_P1733161 | BEST3              | -0.66572356       | -0.888605        | No data availab  | No data availab  | -0.77716203  | -0.056912623     | -0.2207735       | No data availab  | 0.2394903    | 0.2394903    |
| A_01_P1769556 | SOX13              | -0.5043044        | -0.5923616       | -0.88490474      | -1.0249814       | -0.751638035 | 0.35979968       | -0.29369766      | 0.18478714       | -0.38780236  | -0.10150761  |
| A_01_P1730451 | POLL               | -0.65052277       | -0.3888603       | -0.682607        | -0.8793837       | -0.650350075 | 0.02092536       | -0.5306149       | 0.38654485       | -0.02040917  | 0.18302284   |
| A_01_P1818591 | LOC710563          | -0.6262061        | -1.1290017       | -1.513186        | -0.9934832       | -1.06546925  | -0.3568155       | -0.48075104      | 0.4659154        | -0.16519377  | 0.315554135  |
| A_01_P012111  | ENSMUTU00000020240 | -0.96453685       | -0.5894863       | -0.4133709       | -1.2506264       | -0.804505113 | -0.21895231      | 0.08231426       | -0.1781578       | 0.2609468    | 0.0413945    |
| A_01_P004961  | A_01_P004961       | -1.5597405        | -1.600417        | -0.67357695      | -1.7119886       | -1.386430763 | 0.08307154       | -1.1456217       | 0.24250281       | 0.38481364   | 0.313658225  |
| A_01_P1786271 | A_01_P1786271      | -0.48944333       | -0.5502806       | -1.071179        | -0.6809645       | -0.697966858 | 0.14818609       | 0.09729371       | -0.214474        | -0.058594037 | -0.136534019 |
| A_01_P007159  | GIB2               | 0.7262541         | 0.57796234       | 1.6052377        | 1.6443983        | 1.13846311   | -0.8405265       | 0.10607965       | 0.07636661       | 0.39055905   | 0.23346283   |
| A_01_P1680791 | LOC696317          | 1.2624823         | 0.73378193       | 1.0851675        | 1.6632062        | 1.186159483  | -0.55054265      | 0.74121255       | -1.1410327       | 0.25365233   | -0.443690185 |
| A_01_P1768961 | ENSMUTU0000000189  | 0.55718756        | 1.0251585        | 0.3422098        | 0.6310717        | 0.63890689   | 0.13595614       | 0.1301204        | -0.07291779      | -0.22418077  | -0.14854928  |
| A_01_P1691596 | LOC715310          | -1.0035462        | -1.9290267       | -1.788746        | -1.5035415       | -1.5562151   | 0.5370144        | -1.412114        | 0.4781678        | -0.35789022  | 0.06013579   |
| A_01_P1820911 | A_01_P1820911      | -0.93195915       | -0.58149004      | -1.0790654       | -1.2485839       | -0.960274623 | -0.23151559      | -0.34377503      | -0.18855886      | 0.56832576   | 0.18988345   |
| A_01_P1744086 | ENSMUTU0000040777  | No data available | 1.0997674        | 2.0518632        | 1.4779131        | 1.543181233  | -0.6295789       | 0.5521427        | No data availabl | -0.1723871   | -0.1723871   |
| A_01_P1729271 | A_01_P1729271      | -1.1529857        | -0.8252934       | -1.3063257       | -0.6570339       | -0.985409675 | 0.12425023       | -0.67851925      | -0.15925207      | 0.47484246   | 0.15792792   |
| A_01_P1729011 | ZNF33A             | -0.2335887        | -0.6732459       | -0.81005454      | -1.0798198       | -0.699119778 | -0.11699891      | -0.35265929      | 0.21682232       | -0.043626502 | 0.086597934  |
| A_01_P1799036 | LOC710257          | -1.2142717        | -0.3233541       | -1.0708          | -0.6586742       | -0.816775    | -0.3169273       | -0.57152414      | 0.36945164       | 0.3015728    | 0.33549422   |
| A_01_P1787896 | EG703373           | No data available | -1.9750499       | -1.6734551       | No data availabl | -1.8242525   | -0.251568        | No data availabl | 0.29812762       | -0.10396958  | 0.09707902   |
| A_01_P1796176 | JV514933           | -0.60825586       | -1.2008214       | -0.443971        | -0.5641619       | -0.70430254  | 0.15259726       | -0.42655078      | 0.7273428        | -0.09496158  | 0.08886635   |
| A_01_P1712676 | ENSMUTU0000005052  | 0.83027446        | 0.4493259        | 0.76497453       | 0.763106         | 0.701920223  | 0.24036133       | 0.24929585       | -0.7214197       | -0.020405682 | -0.370948691 |
| A_01_P1806221 | ENSMUTU0000029638  | 1.0500067         | 0.32173505       | 1.0644389        | 0.8760409        | 0.828054113  | -0.02266775      | 0.19969167       | -0.5560035       | 0.24726216   | -0.15437067  |
| A_01_P1765811 | NSUN4              | 0.4403699         | 0.58569336       | 0.58739533       | 0.8923898        | 0.626462048  | -0.13677667      | 0.49924883       | -0.4136363       | 0.062101655  | -0.175767323 |
| A_01_P1705051 | IL28B              | 1.0327358         | 0.47002342       | 0.5025605        | 0.46038526       | 0.616426245  | 0.3225397        | -0.16103204      | -0.09446242      | -0.12270519  | -0.108583805 |
| A_01_P1713156 | PLEKHG4            | -0.6390217        | -0.38642284      | -0.99120927      | -0.9706713       | -0.746831278 | 0.14439157       | -0.5074807       | 0.3471273        | -0.12150944  | 0.11280893   |
| A_01_P1682521 | LOC713488          | -1.250696         | -3.4932213       | -1.8905555       | -3.5889142       | -2.54829675  | 0.7273619        | -1.5712156       | 0.37135285       | -0.48539573  | -0.05702144  |
| A_01_P1740756 | RRAGB              | -0.6350242        | -0.4261015       | -0.833659        | -0.74915385      | -0.660984638 | 0.065460674      | -0.055232325     | 0.14268297       | -0.17270246  | -0.015009745 |
| A_01_P1689451 | LOC709709          | -0.9346008        | -0.88240606      | -1.1519054       | -1.4095848       | -1.094624265 | 0.28923836       | -0.2851872       | 0.42452072       | -0.2249672   | 0.09977      |
| A_01_P018131  | TAS2R60            | No data available | -1.4212786       | No data availabl | -1.6364186       | -1.5288486   | 0.2703903        | 0.5514212        | -0.67329884      | -0.51196647  | -0.592632655 |
| A_01_P1828601 | JV553910           | -1.528155         | -0.89235157      | -0.66477567      | -0.9488548       | -1.00853426  | -0.34999734      | -0.5645807       | -0.08605758      | 0.6754863    | 0.29471436   |
| A_01_P1694676 | ZNF267             | 0.8156485         | 0.43002005       | 1.6994475        | 1.8097568        | 1.188927213  | -0.29037175      | 0.353804         | -0.8559093       | 0.43898058   | -0.213350175 |
| A_01_P1775311 | JV542624           | -0.4583891        | -0.7745789       | -0.7857723       | -0.5854755       | -0.65177395  | 0.23012498       | -0.5002721       | 0.30863622       | -0.18187962  | 0.06373793   |
| A_01_P1748886 | LOC705720          | -1.3659142        | -0.4870174       | -1.3801711       | -0.3127086       | -0.886677825 | -0.28095958      | -0.18519264      | -0.12004719      | 0.46180675   | 0.17088073   |
| A_01_P003073  | PD2P               | -1.2421974        | -0.8217555       | -1.2601605       | -1.3849411       | -1.2672612   | 0.004844691      | -1.3849411       | 0.04702256       | 0.19062075   | 0.333121655  |
| A_01_P1742461 | PNNM3              | 0.53838625        | No data availabl | 0.9526905        | 0.83719325       | 0.774573333  | -0.4284671       | 0.31828076       | No data availabl | 0.014050629  | 0.014050629  |
| A_01_P1712766 | ENSMUTU0000039357  | 0.573082          | 0.39571548       | 1.0997746        | 0.63135055       | 0.674981783  | -0.16394168      | -0.023363687     | 0.026370626      | -0.1891058   | -0.081265587 |
| A_01_P007660  | ENSMUTU0000007680  | -0.70661664       | -0.45007366      | -0.62324033      | No data availabl | -0.59331111  | No data availabl | 0.08177687       | No data availabl | -0.08670324  | -0.08670324  |
| A_01_P1743251 | ENSMUTU00000031031 | 0.5012875         | 0.43326643       | 0.75796866       | 0.70104146       | 0.598391013  | 0.15762033       | -0.008617249     | -0.023801427     | -0.1410293   | -0.082415364 |
| A_01_P1686411 | GCH1               | 1.8910743         | 0.72255427       | 1.4829082        | 1.4057364        | 1.375568293  | 0.07437212       | 0.9870576        | -1.0554161       | -1.0475154   | -1.05146575  |
| A_01_P1788616 | JU349901           | -0.9261245        | -1.2131559       | -0.82961327      | -1.0459951       | -1.003721293 | 0.48170066       | -0.85147065      | 0.22746659       | -0.18667118  | 0.020387705  |
| A_01_P1734226 | RAB35              | 0.3433419         | 0.3927702        | 0.56771743       | 0.8975366        | 0.500341533  | -0.31544247      | 0.40639658       | -0.34222755      | 0.04067902   | -0.150774265 |
| A_01_P019113  | EMLS               | -1.5453391        | -0.95369846      | -1.2499588       | -1.5832126       | -1.33305149  | -0.17781626      | -1.2146525       | 0.59051603       | 0.23792794   | 0.414221985  |
| A_01_P008495  | LOC696389          | -0.53697336       | -0.7104357       | -1.0053817       | -1.42011064      | -0.79397429  | 0.47303188       | -0.2506987       | 0.007322807      | -0.38833314  | -0.188255166 |
| A_01_P1827506 | A_01_P1827506      | -0.7700451        | -0.9480894       | -0.79253566      | No data availabl | -0.836890053 | -0.31564742      | -0.44786559      | -0.012197521     | 0.5575838    | -0.27693144  |
| A_01_P1779269 | A_01_P1779269      | -0.17968681       | -0.88344204      | -0.7966447       | -1.1893111       | -0.762271163 | 0.3592682        | -0.12353514      | -0.04520403      | -0.56857895  | -0.156299119 |
| A_01_P1677207 | ENSMUTU0000013321  | No data available | No data availabl | 2.2747047        | 1.602667         | 1.93868585   | No data availabl | -1.281599        | 0.31745678       | 0.42495292   | 0.37120487   |
| A_01_P1742626 | FAM3A              | 0.6655213         | 0.48635226       | 0.9117958        | 0.6233056        | 0.67174374   | 0.18801846       | 0.004404625      | -0.09577379      | -0.11720165  | -0.1064887   |
| A_01_P006243  | LOC715757          | 0.572694          | 0.35081202       | 0.98672396       | 0.554074         | 0.616075995  | 0.26170844       | -0.09988821      | -0.6030395       | 0.27456784   | -0.16423583  |
| A_01_P1700021 | LOC720498          | -0.90786344       | -0.16452625      | -1.0045474       | -0.9103793       | -0.75705698  | -0.25329062      | -0.3585862       | 0.3980905        | 0.07223419   | 0.235162345  |
| A_01_P001703  | MTX1               | 0.787006          | 0.49478212       | 1.1592741        | 1.5755199        | 1.00414553   | -0.13227257      | 0.84088683       | -0.8826315       | -0.4072128   | -0.64492215  |
| A_01_P1824281 | A_01_P1824281      | -0.8106099        | -0.9342007       | -1.0881643       | -1.15589407      | -1.0242589   | -0.12217075      | -0.16698545      | -0.13461159      | -0.17447712  | 0.020157765  |
| A_01_P1784312 | A_01_P1784312      | 0.3457373         | 0.7195273        | No data availabl | 0.9368861        | 0.667983567  | No data availabl | -0.10604279      | No data availabl | 0.09877923   | 0.09877923   |
| A_01_P1703871 | ENSMUTU00000038680 | 0.56321186        | 0.25899425       | 1.0982114        | 0.95018004       | 0.627649388  | 0.18516217       | -0.36282859      | 0.030374825      | -0.08793656  | 0.060055693  |
| A_01_P014192  | A_01_P014192       | 0.7197549         | 0.13198487       | 1.3739827        | 1.4121004        | 0.909456718  | 0.0070502        | 0.49976075       | -0.4350923       | -0.24900696  | -0.34204963  |
| A_01_P1718276 | NF2                | 0.6638792         | 0.5517886        | 0.5490509        | 0.6293533        | 0.598518     | 0.16490294       | 0.045007374      | -0.10141937      | -0.12799037  | -0.11470487  |
| A_01_P1765526 | HIVEP3             | 0.19634128        | 0.6083872        | 0.68901134       | 0.8779389        | 0.59291968   | -0.15463017      | 0.358985         | 0.06405016       | -0.37012127  | -0.153035555 |
| A_01_P1738581 | ENSMUTU00000038974 | 0.6557231         | 0.530918         | 0.6391218        | 0.7586335        | 0.646099188  | 0.16624814       | -0.120919468     | 0.07433145       | -0.1433901   | -0.034529325 |
| A_01_P1792331 | JV620264           | -1.3160334        | -1.5098529       | -0.75704455      | -1.1719387       | -1.188717388 | 0.13384539       | -0.8775926       | 0.2918962        | 0.18172431   | 0.236810255  |
| A_01_P1800841 | LOC100424022       | No data available | No data availabl | 3.2069864        | 2.01403818       | 2.8086841    | -1.789964        | -1.5377064       | 0.26948          | 1.1117091    | 0.6905455    |
| A_01_P1738016 | ENSMUTU00000022973 | -0.95466226       | -1.0724459       | -0.45254636      | -0.56497496      | -0.76115737  | 0.11577331       | -0.30082708      | -0.16085476      | 0.2751984    | 0.05717182   |
| A_01_P1695511 | FAS                | 0.70541567        | 0.17497991       | 1.2378901        | 1.0323566        | 0.67768532   | -0.13953975      | 0.5283755        | -0.4070613       | -0.10733194  | -0.28904662  |
| A_01_P013434  | JV646637           | -0.6689263        | -0.7185625       | -0.65715483      | -0.9306927       | -0.696334083 | 0.044283047      | -0.50891334      | 0.49942514       | -0.23035088  | 0.1345317    |
| A_01_P1783276 | LOC701865          | 0.71752644        | 0.39585786       | 1.1636554        | 0.6231751        | 0.7249862    | 0.15275986       | -0.23806313      | -0.37175262      | 0.34207657   | -0.014838025 |
| A_01_P1832546 | ENSMUTU00000047585 | 0.65094           | 0.61586946       | 2.0594819        | 0.8414554        | 1.04193669   | 0.27042395       | 0.022460606      | -0.07012281      | 0.25760204   | -0.173312425 |
| A_01_P1724971 | LOC712485          | -0.902378         | -0.53876036      | -1.0599395       | -1.3061144       | -0.951798065 | 0.24737692       | -0.6125669       | 0.5158581        | -0.4585873   | 0.0300004    |
| A_01_P1820761 | A_01_P1820761      | 0.89368916        | No data availabl | 1.0426655        | No data availabl | 0.96817733   | -0.034921825     | No data availabl | No data availabl | 0.034096364  | 0.034096364  |
| A_01_P1751591 | ENSMUTU0000010131  | No data available | No data availabl | 0.9470555        | 0.6590241        | 0.8030398    | -0.08308785      | -0.2726703       | 0.2099706        | 0.099651195  | 0.154810898  |
| A_01_P1708936 | ENSMUTU0000042068  | 0.48614746        | 0.77524894       | 0.8304883        | 0.8142618        | 0.726356625  | 0.35743347       | -0.001121207     | -0.23813766      | -0.17941613  | -0.218039645 |
| A_01_P1786511 | CYFIP2             | -0.6116961        | -0.49633268      | -0.70499206      | -0.98218167      | -0.698800628 | 0.16165996       | -0.49454737      | 0.19367515       | 0.03976427   | 0.116735789  |
| A_01_P001599  | ENSMUTU00000022653 | 0.59697443        | 0.4792685        | 0.90338963       | 1.3006619        | 0.820073615  | -0.              |                  |                  |              |              |

|                |                    |             |                   |                   |                   |              |                   |              |                   |                   |              |
|----------------|--------------------|-------------|-------------------|-------------------|-------------------|--------------|-------------------|--------------|-------------------|-------------------|--------------|
| A_01_P003487   | CHST11             | 0.5155259   | 0.3173004         | 1.1479609         | 1.1147357         | 0.773880725  | -0.41405317       | 0.18376394   | -0.48580402       | 0.48495868        | -0.00042267  |
| A_01_P17700831 | ENSMMU00000044424  | 0.82130396  | 0.4244107         | 0.4906214         | 0.83969015        | 0.64406553   | 0.32565117        | 0.12799932   | -0.11507129       | -0.08880462       | -0.101937955 |
| A_01_P1797851  | A_01_P1797851      | 1.1702923   | 0.6446913         | 0.57719797        | 0.8278461         | 0.805066918  | -0.357261         | 0.20737156   | -0.30066092       | 0.32528418        | 0.101229408  |
| A_01_P1720321  | ZDBF2              | -0.89495075 | -0.83834386       | -0.9220424        | -0.90829456       | -0.890907893 | 0.30367485        | -0.7903479   | 0.18306257        | 0.07363477        | 0.12834867   |
| A_01_P1702771  | GN411              | 0.19153911  | 1.0224            | 0.5570712         | 0.6755335         | 0.611636403  | -0.44023246       | -0.13191956  | 0.09455534        | 0.35910663        | 0.226830985  |
| A_01_P1670491  | PPARA              | -0.6840948  | -0.2257275        | -0.6717276        | -0.9641283        | -0.63641955  | 0.10046825        | -0.43439293  | 0.36955003        | -0.15848029       | 0.105510005  |
| A_01_P1726701  | LOC717806          | 1.2675018   | 1.3749831         | No data available | No data available | 1.32124245   | 0.23174371        | 0.36709368   | -0.4202077        | -0.34249327       | -0.381350035 |
| A_01_P1720506  | IGFBP5             | -0.1793719  | -1.2885658        | -1.7161267        | -1.29114          | -1.3438011   | -0.01911938       | -1.1374593   | 0.6346633         | 0.008673788       | 0.321668544  |
| A_01_P1726836  | POLD3              | 0.54099697  | 0.36927718        | 0.7597944         | 0.76346964        | 0.608384548  | -0.14292964       | 0.41353337   | -0.36607698       | -0.019626355      | -0.192851668 |
| A_01_P015855   | CN802789           | -0.56420743 | -0.7679476        | -0.765806         | -0.76718694       | -0.716286993 | 0.31371275        | -0.46762827  | -0.019843247      | 0.067095555       | 0.023626154  |
| A_01_P019574   | JU341905           | -0.7609079  | -0.82121193       | -0.4394267        | No data available | -0.673848843 | -0.025045626      | 0.42956036   | -0.11475039       | -0.42111853       | -0.26793446  |
| A_01_P013647   | CSRN1P             | 0.52618486  | 0.3871708         | 1.4046434         | 1.3682182         | 0.921554315  | -0.256942         | 0.79945713   | -0.53954273       | -0.44476295       | -0.49215284  |
| A_01_P1706927  | ENSMMU00000030945  | 0.5256503   | 0.3752012         | 0.883407          | 0.8722784         | 0.664134225  | -0.42753986       | 0.39675057   | -0.38004044       | 0.22837688        | -0.07583178  |
| A_01_P1671376  | MYD88              | 1.106201    | 1.1254476         | 0.58311987        | 0.8310033         | 0.911442943  | 0.2082226         | 0.5176844    | -0.21887246       | -0.8524497        | -0.53566108  |
| A_01_P003385   | FAM117A            | -0.56901294 | -0.47402954       | -0.5047148        | -0.9375309        | -0.621322045 | 0.018416861       | -0.38606298  | 0.06953532        | -0.22966039       | 0.149597855  |
| A_01_P1695161  | LOC720040          | 0.49045712  | 0.47845945        | 0.8057844         | 1.0385334         | 0.714559643  | -0.40984884       | 0.5805404    | -0.086106874      | -0.31267127       | -0.199389522 |
| A_01_P012442   | BAK1               | 0.883791    | 0.54425865        | 0.7939114         | 0.7255508         | 0.715717463  | -0.09887034       | 0.573063     | -0.4297088        | -0.2386862        | -0.3567885   |
| A_01_P175901   | JV537920           | -0.6439754  | -0.9167486        | -0.45196846       | -0.9198425        | -0.733127805 | 0.41141206        | -0.33678984  | -0.20897189       | 0.01871704        | -0.095127425 |
| A_01_P1680991  | CASP7              | -0.14190273 | 0.4660035         | 0.89919696        | 0.91667104        | 0.603623558  | -0.03338533       | 0.46261381   | -0.40063897       | -0.14512995       | -0.27100846  |
| A_01_P1762456  | ENSMMU00000041767  | 0.85223943  | 0.42454782        | 0.91034657        | 0.79356666        | 0.74512262   | 0.24345033        | -0.36404477  | 0.028852532       | 0.027150583       | 0.028001568  |
| A_01_P1704771  | SYNE4              | -0.78009015 | -0.87601364       | -0.5421014        | -0.5980646        | -0.699067538 | -0.04808694       | -0.2337571   | -0.05959796       | -0.28887127       | 0.248964615  |
| A_01_P1779951  | A_01_P1779951      | -0.7267859  | -1.2515308        | -1.0029643        | -1.7374048        | -1.17967145  | 0.4075599         | -0.9998454   | 0.19339436        | 0.042721435       | -0.118057898 |
| A_01_P1818491  | A_01_P1818491      | 0.8218802   | 0.27623603        | 0.6435973         | 0.52909535        | 0.56770222   | -0.20247017       | 0.30562037   | 0.1387752         | -0.33275515       | -0.09689975  |
| A_01_P002298   | CDC42EP2           | 0.8205983   | 0.1528307         | 0.7894157         | 0.63447106        | 0.59932894   | 0.013264225       | 0.28537443   | -0.21664362       | -0.1337301        | -0.17518686  |
| A_01_P1710506  | ABC9A              | -0.67433965 | -0.47671086       | -0.9615562        | -1.0251056        | -0.784428078 | 0.43054673        | -0.1783566   | 0.04196489        | -0.43629155       | -0.19176333  |
| A_01_P1800741  | A_01_P1800741      | -1.0165472  | -1.1619924        | -1.0397443        | -1.2422594        | -1.115135825 | -0.33352417       | -0.5593348   | 0.026992261       | 0.59359008        | 0.310246531  |
| A_01_P1751366  | ENSMMU00000022329  | -1.3908783  | -0.4204267        | -1.1965566        | -0.70244664       | -0.927581515 | -0.3259678        | -0.2080802   | 0.51373255        | -0.13795039       | 0.18789108   |
| A_01_P1678721  | B4GALT1            | 0.41524428  | 0.4840542         | 1.0125661         | 1.2507455         | 0.79065252   | -0.5069551        | 0.59854835   | -0.41336885       | 0.044371106       | -0.184498872 |
| A_01_P1711431  | ENSMMU00000009371  | -0.5591723  | -0.14569048       | -0.53691274       | -1.0065227        | -0.629574555 | -0.13163559       | -0.01285931  | 0.2854293         | -0.18884484       | -0.48290545  |
| A_01_P1834357  | LOC697860          | 0.8423467   | 0.7664765         | 0.4896235         | 0.8444406         | 0.735721538  | 0.28497007        | 0.028414164  | -0.14840794       | -0.2184666        | -0.18349706  |
| A_01_P1806786  | LRAT               | -1.4354945  | -1.4970237        | -0.9506342        | -0.38667893       | -1.067457833 | -0.46146494       | -0.5828122   | 0.71613294        | -0.053916164      | 0.331103888  |
| A_01_P1722591  | NRA3               | 0.9620065   | 1.1336818         | 1.1099151         | 1.7607369         | 1.2340706    | -0.5473816        | 0.89012444   | -0.38979045       | -0.453045145      | -0.453045145 |
| A_01_P1727316  | ENSMMU00000043750  | -0.8567825  | -0.1170456        | -0.63698417       | -1.1630185        | -0.943457693 | 0.14213885        | -0.56522954  | -0.29757458       | 0.4926152         | -0.09752031  |
| A_01_P007111   | HECTD2             | -0.9771053  | -0.7969194        | -0.45064035       | -0.37197804       | -0.649160773 | 0.08341959        | -0.05838604  | 0.058816694       | -0.09153875       | -0.016361028 |
| A_01_P1671581  | GPR11              | 0.93659735  | 0.48874998        | 0.328335          | 0.65176624        | 0.601362143  | -0.22315727       | -0.107204296 | No data available | 0.2808686         | 0.2808686    |
| A_01_P1718306  | LOC715315          | -0.99676365 | -0.13750613       | -1.5446031        | -0.9911716        | -0.91764612  | -0.21095785       | 0.001365507  | -0.024896365      | -0.020869429      | -0.010684929 |
| A_01_P1687036  | ENSMMU000000041705 | -2.562477   | No data available | -2.4671166        | -2.5296671        | -2.519753567 | -0.2780883        | -0.355552    | 0.65625366        | -0.29038626       | 0.1829696    |
| A_01_P1800986  | A_01_P1800986      | 0.19264048  | 0.7180433         | 0.80140615        | 0.81026524        | 0.630588793  | -0.3126164        | 0.1316879    | -0.2737417        | 0.1715641         | -0.050905035 |
| A_01_P1785386  | IRG1               | 1.2033546   | 0.07136645        | 3.850481          | 4.4482613         | 2.393365838  | -1.8846961        | -1.6471704   | -2.604891         | 1.6984643         | -0.45321335  |
| A_01_P1778447  | ENSMMU00000039723  | -1.0060804  | -1.0656687        | -0.44511387       | -0.51299036       | -0.756059333 | 0.2583176         | -0.5178925   | 0.19619604        | -0.019317374      | 0.071334333  |
| A_01_P1729706  | ENSMMU00000007967  | 0.5979874   | 0.58491606        | 0.42899406        | 0.79258907        | 0.601121648  | 0.1446293         | -0.23425885  | 0.13583005        | -0.08055695       | 0.027647378  |
| A_01_P1819991  | A_01_P1819991      | -1.1297429  | -0.3946326        | -1.365482         | -1.611473         | -1.118094175 | -0.44126856       | -0.43768024  | 0.27285898        | 0.39724728        | 0.33505313   |
| A_01_P012770   | JU326937           | -0.543474   | -0.35811827       | -0.3065244        | -0.96894467       | -0.620000335 | -0.21086161       | -0.3659707   | -0.006525222      | 0.44822297        | 0.220983874  |
| A_01_P1749036  | CHY1               | 0.81245065  | 0.585018          | 0.986038          | 1.2341958         | 0.904425613  | -0.17175221       | 0.8194659    | -0.5575207        | -0.5820747        | -0.569784285 |
| A_01_P1678131  | CO4A3              | -2.1997344  | -0.96156925       | -1.1276546        | -1.8507243        | -1.572143388 | -0.76145226       | -0.3935888   | 0.7418757         | 0.30428537        | 0.353795165  |
| A_01_P1775381  | A_01_P1775381      | 0.1938165   | 0.56775814        | 1.166593          | 0.9231792         | 0.71283671   | 0.09971829        | 0.31039643   | -0.06335955       | -0.45136222       | -0.257359085 |
| A_01_P013646   | JV709789           | 0.74261177  | 0.2503842         | 0.8202162         | 0.9726245         | 0.696833973  | -0.22315587       | 0.13196895   | -0.33073356       | -0.3014512        | -0.31591238  |
| A_01_P008326   | JV666145           | -0.79121307 | -0.9610313        | -0.40539086       | -0.37925862       | -0.616223363 | 0.20320535        | -0.36652035  | -0.18065033       | -0.007358092      | 0.050623619  |
| A_01_P18008326 | ENSMMU00000000126  | -0.79269266 | -0.06331489       | -1.005239         | -1.09212132       | -0.78345713  | -0.24848475       | 0.12502535   | -0.24051498       | -0.288363         | 0.02392401   |
| A_01_P1680001  | ELMOD1             | 0.37195686  | 0.84175074        | No data available | 1.0200375         | 0.7445817    | 0.121604815       | -0.10013709  | 0.29999748        | -0.41892818       | -0.05947435  |
| A_01_P1770436  | ENSMMU00000044586  | 0.7742535   | 0.4960804         | 0.75413334        | 0.8541778         | 0.71966126   | 0.30254048        | -0.17515877  | -0.10338202       | -0.1260548        | -0.16249375  |
| A_01_P1762141  | LOC698727          | 0.6939901   | 0.27195993        | 1.314497          | 0.85118514        | 0.782908403  | 0.06797047        | 0.40725545   | -0.7548734        | 0.046841577       | -0.354015912 |
| A_01_P1794586  | A_01_P1794586      | -0.9100109  | -0.9691256        | -1.1579062        | -0.5870904        | -0.906032725 | No data available | -0.14985275  | 0.13574184        | No data available | 0.13574184   |
| A_01_P1784686  | JV727237           | -0.83137256 | -0.7713451        | -0.71410906       | -0.17136414       | -0.622047715 | -0.014663904      | -0.4745253   | 0.19466984        | 0.1965403         | 0.19650077   |
| A_01_P1806086  | A_01_P1806086      | -0.75505626 | -0.9741601        | -1.0772411        | -0.563198         | -0.842413865 | 0.105499975       | -0.059693392 | -0.2983415        | 0.20348692        | -0.04772765  |
| A_01_P008287   | JV580713           | 0.8585263   | 0.5231655         | 1.2321594         | 1.3080941         | 1.003736325  | -0.6107015        | -0.2737396   | -0.8481174        | -0.17170301       | -0.509910205 |
| A_01_P1752896  | MEGF10             | 0.7086138   | 1.1697356         | 0.96595895        | No data available | 0.948102783  | No data available | -0.2988107   | -0.2782055        | 0.44681197        | 0.084303235  |
| A_01_P1688366  | TIFA               | 0.6048993   | 0.20888938        | 1.1673949         | 1.4175748         | 0.849689595  | 0.2059115         | -0.2443517   | -0.076736994      | 0.07613529        | -0.000300852 |
| A_01_P1738201  | PCMTD1             | -0.6754916  | -0.8915339        | -0.3223684        | -0.9301612        | -0.704888775 | 0.3204027         | -0.49120616  | 0.15352482        | -0.084062375      | 0.034731233  |
| A_01_P1820341  | ENSMMU00000000126  | -0.5345814  | -0.8354045        | -0.13539366       | -0.98180187       | -0.621795358 | -0.2408898        | 0.057352064  | -0.03806383       | 0.08890605        | -0.07501611  |
| A_01_P1689546  | ENSMMU00000033161  | -0.3301222  | -0.69841963       | -0.5075605        | -0.9147994        | -0.612725433 | 0.17659791        | -0.4619218   | 0.24881792        | -0.065622896      | 0.091597512  |
| A_01_P1750011  | GCH1               | 1.7743745   | 1.2770117         | 1.2760122         | 1.3204885         | 1.273470725  | -0.059225634      | 1.0095172    | -0.9249943        | -1.09991842       | -0.06206425  |
| A_01_P003654   | RALGPD5            | -0.5526926  | -0.8488487        | -0.9765447        | -1.042329         | -0.855104325 | 0.23593563        | -0.7349801   | 0.20949145        | 0.09111477        | 0.15030311   |
| A_01_P1761871  | AKAP9              | -0.8218023  | -0.69887435       | -0.2444942        | -0.8791662        | -0.661084263 | 0.04172632        | -0.28367093  | 0.29153776        | -0.028813446      | 0.131362157  |
| A_01_P017521   | JV528645           | -0.7146     | -0.21549106       | -0.99705285       | -1.2107617        | -0.784476403 | -0.009240837      | -0.41681275  | 0.37917778        | -0.063847706      | 0.157665037  |
| A_01_P1808371  | A_01_P1808371      | -0.9231368  | -0.9634182        | -1.3574144        | -0.8392464        | -1.0208039   | 0.4607732         | -0.23514808  | -0.16075796       | -0.10322526       | -0.13199161  |
| A_01_P1831246  | ENSMMU00000038919  | 0.50578743  | 0.3863166         | 0.70230186        | 0.7484131         | 0.573783513  | 0.10430921        | -0.07480942  | 0.29124743        | -0.4114736        | -0.060113085 |
| A_01_P1831321  | ENSMMU00000016622  | 0.6581961   | 0.6884599         | 0.589550736       | 0.91481894        | 0.799244325  | 0.22686504        | 0.050792757  | -0.0742609        | -0.24441679       | -0.15942416  |
| A_01_P1699946  | ENSMMU00000048192  | 0.5622973   | 1.1423012         | 0.36469373        | 0.57146764        | 0.660189968  | -0.               |              |                   |                   |              |

|               |                   |                   |                   |                   |                   |              |                   |                   |                   |                   |              |
|---------------|-------------------|-------------------|-------------------|-------------------|-------------------|--------------|-------------------|-------------------|-------------------|-------------------|--------------|
| A_01_P169456  | AB513674          | 1.1797892         | 1.0632664         | 0.16721445        | 0.95549667        | 0.84144168   | 0.33623958        | -0.090734236      | -0.55320466       | 0.159615          | -0.19679483  |
| A_01_P1719766 | ENSMMU00000011877 | -0.5497417        | -0.3053537        | -1.1511748        | -1.0449494        | -0.762804818 | 0.16510189        | -0.3460712        | 0.15260762        | -0.028477583      | 0.06206510   |
| A_01_P1808226 | A_01_P1808226     | 0.8861149         | 0.29033318        | 1.8934726         | 1.5357012         | 1.15140547   | 0.30502775        | 0.45502827        | -0.4679371        | -0.57612526       | -0.52204405  |
| A_01_P1692071 | FM05              | -0.6341766        | -0.77839816       | -0.6279484        | -0.44447586       | -0.621249755 | 0.3648997         | -0.0467286        | 0.10450838        | -0.13026968       | -0.01288065  |
| A_01_P1806496 | JV057207          | -0.9025441        | -0.5683736        | -0.6473766        | -0.97451234       | -0.77320166  | 0.3219754         | -0.46584627       | 0.24671987        | -0.2525588        | -0.002919465 |
| A_01_P1736636 | IL18R1            | 0.6654039         | 0.7419542         | 0.9252441         | 1.6591902         | 0.9979481    | 0.0771813         | 0.70286745        | -0.8727501        | -0.3748167        | -0.6237834   |
| A_01_P1761161 | ENSMMU00000042334 | 0.7465661         | 0.46455           | 0.6141333         | 0.8357227         | 0.665243025  | 0.22971554        | -0.17934403       | 0.018134115       | -0.10215985       | -0.04200368  |
| A_01_P1702641 | ENSMMU00000019303 | 0.8158782         | 0.59986055        | 0.48734266        | 0.90807444        | 0.702788963  | 0.27857792        | -0.11603133       | -0.09555794       | -0.10723023       | -0.101394085 |
| A_01_P1814976 | A_01_P1814976     | 1.4672009         | 1.1254256         | 2.1584997         | 1.5672572         | 1.57959585   | 0.22770539        | 0.40419555        | -2.0031853        | 0.32910022        | -0.83704254  |
| A_01_P1758391 | LOC701085         | -1.7478032        | No data available | -2.2054865        | -1.0792953        | -1.677528333 | -0.31804317       | 0.32365018        | -0.58228276       | 0.35439023        | -0.113947765 |
| A_01_P003594  | LOC704627         | -1.5144056        | -0.9155924        | -1.1876901        | -0.9893739        | -1.1517655   | 0.10539431        | No data available | 0.27460223        | -0.48489082       | -0.105144295 |
| A_01_P1801456 | LOC708822         | -1.5751761        | No data available | -1.6387275        | No data available | -1.6069518   | -0.2881879        | -1.25E-04         | No data available | 2.40E-01          | 0.2402003    |
| A_01_P1770326 | ENSMMU00000044674 | 0.7411388         | 0.09691087        | 1.1564121         | 0.891569          | 0.721507693  | 0.30165526        | -0.40791017       | 0.06366449        | -0.04601088       | 0.008826805  |
| A_01_P1680451 | LOC698176         | 0.56049025        | 0.31011403        | 0.790723          | 0.7770379         | 0.609591295  | -0.038767412      | 0.5240361         | -0.5011495        | -0.18115333       | -0.34115114  |
| A_01_P1733066 | ENSMMU00000006726 | 0.9117406         | 0.6083181         | 1.4187205         | 1.0388043         | 0.994395875  | 0.3754555         | 0.12552808        | -0.6418371        | -0.042534977      | -0.342186039 |
| A_01_P1779721 | A_01_P1779721     | 0.14540154        | 0.79655576        | 0.5256891         | 1.0248181         | 0.623116125  | 0.19130279        | 0.22270766        | -0.4039693        | -0.096178085      | -0.250073693 |
| A_01_P1832676 | ENSMMU00000044445 | 0.6349024         | 0.4171973         | 0.95947605        | 0.7741952         | 0.696239805  | 0.17981632        | -0.19458763       | 0.05176986        | -0.06355705       | -0.005893595 |
| A_01_P1796431 | A_01_P1796431     | -0.64091533       | -0.56582296       | -0.7811558        | -0.9445825        | -0.733110585 | -0.25539473       | -0.5789001        | 0.4200512         | 0.20768091        | 0.133866055  |
| A_01_P1761191 | NUPRIL            | -1.0590726        | -0.20911452       | -0.9892977        | -1.0389065        | -0.824097843 | 0.077025935       | -0.2390988        | -0.7009799        | 0.20611173        | -0.251934085 |
| A_01_P1792941 | A_01_P1792941     | -0.45955348       | -0.66232155       | -0.866135         | -0.5734005        | -0.639330133 | -0.52695847       | -0.15134688       | 0.15878363        | 0.36650807        | 0.26264585   |
| A_01_P1762171 | ENSMMU00000029956 | -1.1670697        | -1.2646453        | -0.8098225        | -0.7639217        | -0.31013723  | 0.24726608        | -0.7423206        | 0.03907852        | -0.24323055       | 0.141654535  |
| A_01_P1676861 | CBFA272           | -0.9961186        | -0.29616526       | -1.0834079        | -0.9577745        | -0.833366565 | 0.11244285        | -0.34955528       | 0.14708906        | 0.038132474       | 0.092610767  |
| A_01_P1755996 | FGA               | No data available | 0.94151664        | 1.0831221         | No data available | 1.01231937   | No data available | -0.018478358      | No data available | 0.018244503       | 0.018244503  |
| A_01_P1769916 | LOC712826         | No data available | 1.2348322         | No data available | 1.3134192         | 1.2741257    | No data available | 0.37697893        | 0.023089346       | -0.5453032        | -0.261106927 |
| A_01_P1722881 | ENSMMU00000046396 | 0.44072422        | 0.25418654        | 1.0459566         | 0.76535916        | 0.62655663   | 0.13597162        | -0.08171542       | 0.115448856       | -0.19607563       | -0.040313388 |
| A_01_P1731348 | ENSMMU00000010371 | -0.4759774        | -0.5476293        | -0.38360113       | -1.0642534        | -0.617865308 | -0.061481602      | -0.19157162       | -0.109100825      | 0.3090637         | 0.09991437   |
| A_01_P1704821 | ZNF729            | -1.0483603        | -0.3181417        | -0.9654586        | -0.6744288        | -0.751596165 | -0.14768195       | -0.11310066       | 0.5600821         | -0.517981         | 0.02105055   |
| A_01_P1824116 | A_01_P1824116     | -0.6335094        | -0.64835334       | -1.2007532        | -0.4980807        | -0.74516731  | 0.06995269        | -0.029122518      | 0.019719835       | -0.06410488       | -0.022192523 |
| A_01_P1710781 | LOC710441         | 0.44873175        | 0.58431304        | 1.8073447         | 2.0065994         | 1.211769723  | -0.58517949       | 0.62471426        | -0.9007848        | 0.32875955        | -0.286012625 |
| A_01_P1702126 | LOC706436         | -1.1288421        | -0.5552189        | -1.9457413        | -1.1368457        | -1.191662    | -0.18039005       | -0.29073757       | -0.061891392      | 0.42443272        | 0.181270666  |
| A_01_P1712831 | NOD2              | 1.0698347         | 0.6649443         | 1.3988289         | 1.6452577         | 1.06853035   | -0.37821975       | 0.7320223         | -0.71525383       | -0.08067635       | -0.386660733 |
| A_01_P1675686 | ENSMMU0000006594  | 0.865531          | 0.63432413        | 1.341069          | 1.1426995         | 1.115928033  | -0.55989844       | 0.75976247        | -0.5857225        | -0.055706967      | -0.320714734 |
| A_01_P1754266 | STK328            | No data available | No data available | -2.0314252        | -2.0368233        | -2.03412425  | 0.31555757        | -0.13195875       | 0.28951573        | -0.68806493       | -0.1992746   |
| A_01_P006693  | JU484364          | 1.807161          | 0.34374878        | 0.9913357         | 1.0971738         | 1.05984582   | 0.19357665        | -0.75844944       | -0.77611083       | -0.78903024       | -0.78000577  |
| A_01_P1832426 | ENSMMU00000045671 | 0.6841559         | 0.46525836        | 0.48612168        | 0.5765629         | 0.59528946   | 0.2077868         | -0.2526713        | 0.017447438       | -0.009290427      | 0.004078527  |
| A_01_P1743141 | ENSMMU00000031118 | -1.2765307        | -1.1308814        | -1.3284183        | -1.0996612        | -1.2089484   | 0.10396663        | -0.56241069       | -0.4433303        | -0.00621293       | 0.131358685  |
| A_01_P1723611 | TRPM3             | No data available | -2.534385         | -2.4700277        | -2.476666         | -2.4936929   | 0.13603486        | -0.64659084       | 0.575527          | -0.3731908        | 0.0116181    |
| A_01_P1831431 | ENSMMU00000021436 | 0.71739936        | 0.4561057         | 0.9672817         | 0.7646785         | 0.726366315  | -0.21586326       | -0.26934445       | 0.11697227        | -0.1133516        | 0.001818555  |
| A_01_P1722066 | LOC699413         | 0.7886949         | No data available | 1.1387823         | No data available | 0.9637386    | -0.23065154       | No data available | -0.14742534       | 0.31601796        | 0.08429631   |
| A_01_P001181  | LOC71441          | 0.4874284         | 0.1966673         | 0.7887533         | 1.2028599         | 0.668977333  | 0.2534482         | 0.19310209        | -0.5340646        | -0.037826262      | -0.285945431 |
| A_01_P1753801 | ENSMMU00000027249 | -0.33487535       | -0.81776446       | -1.0554681        | -1.684041         | -1.123037228 | 0.034469873       | 0.02002022        | -0.05612217       | No data available | -0.05612217  |
| A_01_P1740761 | KLF8              | -0.2780662        | -0.6760787        | -0.46247515       | -1.1167103        | -0.63332588  | 0.19469464        | -0.26723915       | -0.039299544      | 0.07242508        | 0.016562768  |
| A_01_P001169  | LOC719179         | 1.931624          | 0.96886986        | No data available | 1.4743125         | 1.458268787  | -0.048386406      | -0.7014588        | 0.83159876        | -0.6475209        | 0.09203893   |
| A_01_P010970  | WDR19             | -0.4424212        | -0.4340942        | -0.5922351        | -1.0695425        | -0.63457325  | 0.09579764        | -0.46254674       | 0.06325649        | 0.21514267        | 0.13919958   |
| A_01_P1758824 | ENSMMU00000023177 | 1.3819424         | No data available | No data available | 1.921577          | 1.6517597    | -0.2682358        | No data available | No data available | 0.22609624        | 0.22609624   |
| A_01_P1831516 | LOC710042148      | 0.644473          | 0.27489296        | 0.9504766         | 0.5017582         | 0.59290019   | 0.25487408        | -0.2080339        | -0.09344194       | 0.005426155       | -0.044007893 |
| A_01_P1670271 | CXCL11            | 2.2430692         | 0.50004584        | 2.1821659         | 2.4541993         | 1.869743335  | 0.32685736        | 0.77985376        | -1.4705381        | -0.5822588        | -0.12398445  |
| A_01_P003859  | CXORf21           | 1.1519763         | 0.16507873        | 1.3565171         | 0.7396967         | 0.898317208  | -0.22149509       | 0.1956131         | -0.5120789        | 0.37435552        | -0.06866169  |
| A_01_P1741021 | LOC100421418      | 0.44261262        | 0.61600017        | 0.6359277         | 1.2513286         | 0.673858915  | -0.21284959       | 0.14064382        | -0.31589508       | 0.30032226        | -0.00778641  |
| A_01_P1754821 | PRKG2             | -0.45048416       | -0.966354         | -0.8083272        | No data available | -0.741736787 | 0.22970381        | -0.271330085      | 0.051765382       | -0.001683488      | -0.001683488 |
| A_01_P1786556 | LOC705400         | 0.6144813         | 0.69787455        | 0.27672064        | 0.71716824        | 0.590189723  | -0.01857295       | 0.010565937       | 0.051765382       | 0.051656795       | 0.003098716  |
| A_01_P1734366 | WDR66             | -0.6523771        | -0.8314001        | -0.8082858        | -1.0408043        | -0.833216825 | 0.5361586         | -0.42180598       | -0.112006074      | -0.1875425        | -0.149771587 |
| A_01_P1717261 | ENSMMU00000009135 | 0.4288217         | 1.2768685         | 0.522737          | 1.2651439         | 0.873392775  | -0.025024366      | 0.06355439        | -0.70789015       | 0.4435471         | -0.132171525 |
| A_01_P1803246 | LOC705637         | 0.651817          | 0.8156474         | 0.65782475        | 0.8790518         | 0.751085238  | -0.040982746      | -0.24518079       | 0.29125628        | -0.05800452       | 0.11662588   |
| A_01_P1722226 | TNFSF8            | 0.42076632        | 0.4510043         | 1.1538728         | 1.0895123         | 0.77878893   | -0.15583599       | 0.39162263        | -0.47728103       | 0.10056           | -0.18860515  |
| A_01_P009281  | C3H7orf23         | -0.8025247        | -0.6270466        | -0.632306         | -1.1833773        | -0.811310665 | 0.13535592        | -0.65486806       | -0.36473235       | -0.00828517       | -0.166951917 |
| A_01_P1769996 | NCF2              | 0.5297795         | 0.4554405         | 1.4033543         | 0.52192974        | 0.72762601   | -0.12804317       | 0.23522892        | -0.16238746       | 0.023603441       | -0.06939201  |
| A_01_P1718281 | ENSMMU00000025805 | 1.1412846         | 1.2430122         | 2.7526495         | No data available | 1.712315433  | 0.12160497        | 0.5709952         | -1.65282          | 0.14859512        | -0.02711244  |
| A_01_P1694991 | CYR61             | 1.430702          | 0.46020228        | 0.6374628         | 1.2813131         | 0.952420045  | 0.24940443        | 0.27794147        | -0.7289854        | -0.006518227      | -0.367751813 |
| A_01_P1745756 | ENSMMU00000040144 | 0.67361015        | 0.5754167         | 0.813319          | 0.9371991         | 0.749886238  | 0.23282447        | -0.13052002       | 0.007528298       | -0.13965787       | -0.06604786  |
| A_01_P1828971 | JV66069           | -0.8455626        | -0.739307         | -0.6875229        | -0.8805373        | -0.78818745  | -0.007193537      | -0.60763854       | 0.3883836         | 0.06197645        | 0.222907405  |
| A_01_P1831046 | JU329421          | 0.5325115         | 0.7335686         | 1.0252627         | 0.8303708         | 0.8349284    | -0.8035244        | 0.0467384         | -0.17557901       | -0.5967997        | 0.210610345  |
| A_01_P013813  | PPM1K             | -0.9470987        | -0.7441541        | -1.3418983        | -1.3373953        | -1.0926366   | -0.08400832       | -0.6588219        | 0.35269195        | 0.1968976         | 0.274794775  |
| A_01_P1739891 | ENSMMU00000048129 | 0.54279894        | 0.38138795        | 0.89949095        | 0.73185065        | 0.6388821    | 0.3082968         | -0.1333878        | -0.02070517       | -0.15041003       | -0.0852426   |
| A_01_P1796531 | A_01_P1796531     | -0.67004865       | -0.9582534        | -1.0519928        | -2.2498628        | -0.726713268 | -0.33008513       | 0.044190813       | 0.48831812        | -0.37595135       | 0.056183385  |
| A_01_P1800356 | JV628905          | -0.62585914       | -0.5205381        | -1.0857119        | -0.7405918        | -0.67416676  | 0.13715173        | -0.5647336        | 0.15703523        | 0.14951223        | 0.15327373   |
| A_01_P1831376 | ENSMMU00000048159 | 0.5805504         | 0.40116847        | 0.64784616        | 0.6866579         | 0.579055733  | 0.12985668        | -0.05345451       | 0.10051374        | -0.20076147       | -0.050120665 |
| A_01_P173281  | PTPRQ             | -2.241094         | No data available | -2.255892         | No data available | -2.248493    | -0.37790293       | No data available | 0.697297          | -0.11755321       | -0.00911755  |
| A_01_P018376  | CDCD71            | -0.93481445       | -1.5280559        | -0.8542914        | -1.030578         | -1.086934938 | 0.31694603        | -0.10211058       | 0.16377634        | 0.1868451         | 0.17531072   |
| A_01_P1769816 | ENSMMU00000000014 | 0.70030975        | 0.16991766        |                   |                   |              |                   |                   |                   |                   |              |

|               |                   |                   |                   |                  |                  |              |                  |                  |                  |                  |              |
|---------------|-------------------|-------------------|-------------------|------------------|------------------|--------------|------------------|------------------|------------------|------------------|--------------|
| A_01_P1832281 | ENSM0000000023871 | 0.8591284         | 0.56578857        | 0.39258          | 0.6186222        | 0.609029793  | 0.32407874       | -0.13588302      | -0.14799301      | -0.09616329      | -0.12207815  |
| A_01_P1736441 | LOC705927         | 1.4154319         | 1.020185          | 1.765023         | 2.6868055        | 1.72186135   | -0.48880437      | 1.2008755        | -0.2080719       | -0.42448568      | -1.23127879  |
| A_01_P018336  | A_01_P018336      | 0.630608          | No data availabl  | 0.9347206        | 1.1418041        | 0.902197567  | 0.8147806        | -0.38337296      | -0.34334067      | -0.54383226      | -0.443411965 |
| A_01_P1831531 | ENSM0000000043378 | 0.77818054        | 0.47464335        | 0.73872674       | 0.84069306       | 0.780060923  | 0.24537411       | -0.20806690      | -0.026135553     | -0.048627768     | -0.037381661 |
| A_01_P000168  | A_01_P000168      | -0.7160161        | -0.45682642       | -0.721625        | -0.72476095      | -0.654807118 | -0.1651733       | -0.5052869       | 0.24795213       | 0.28320734       | 0.265129685  |
| A_01_P1750571 | ENSM0000000039653 | No data available | 0.6407211         | 0.8578675        | 0.8633438        | 0.7873108    | 0.00443207       | No data availabl | No data availabl | -0.041292068     | -0.041292068 |
| A_01_P1721771 | LOC722440         | 0.9555858         | 0.37359136        | 1.076373         | 0.72218734       | 0.781934375  | 0.2080435        | -0.4691546       | 0.26857212       | -0.12362826      | 0.07247193   |
| A_01_P1832206 | ENSM0000000036863 | 0.6153331         | 0.4553996         | 1.2240888        | 0.71666753       | 0.752872348  | 0.2199134        | -0.295728        | 1.17031614       | -0.15944372      | 0.00543621   |
| A_01_P1826276 | A_01_P1826276     | 2.6008735         | No data availabl  | No data availabl | 2.4975376        | 2.54920555   | No data availabl | -0.112455465     | 0.10431992       | No data availabl | 0.10431992   |
| A_01_P016296  | CXCL10            | 2.072314          | 0.5940413         | 1.7574326        | 1.7256403        | 1.53735705   | -0.004897599     | 1.0821296        | -1.0917493       | -1.2617497       | -1.1767499   |
| A_01_P1767916 | ENSM0000000030608 | 1.5566015         | 0.9125774         | 0.9333441        | No data availabl | 1.134174333  | 0.69388133       | -0.42633235      | -0.24583128      | -0.33117375      | -0.288502515 |
| A_01_P1717406 | ENSM0000000005876 | -1.5791396        | -0.41779414       | -2.0158794       | -2.6216755       | -1.65862216  | -0.6640993       | -0.92431126      | 0.52878875       | 0.48467332       | 0.506731035  |
| A_01_P016054  | KRTDAP            | 0.7676375         | 0.5656018         | 1.0633587        | 0.8419808        | 0.8096447    | -0.24481738      | 0.22591126       | -0.1951077       | -0.39092025      | -0.049706275 |
| A_01_P1755471 | DAPP1             | 0.5986576         | 0.8169266         | 1.3887181        | 1.2318174        | 1.009029925  | -0.26668465      | 0.8924214        | -0.6907597       | -0.5291649       | -0.6099623   |
| A_01_P1723846 | ENSM0000000045892 | 0.6304952         | 0.34993774        | 1.2288761        | 0.8421944        | 0.76287586   | 0.25690475       | -0.13439405      | 0.039913032      | -0.20758858      | -0.083837774 |
| A_01_P1816086 | A_01_P1816086     | -0.8054364        | -0.24839129       | -0.8927248       | -0.6187379       | -0.641322598 | -0.22988036      | 0.3640987        | -0.4007107       | 0.14108245       | -0.129814125 |
| A_01_P1804886 | A_01_P1804886     | 0.6401877         | 0.2762805         | 1.3628923        | 0.66199124       | 0.735337935  | 0.29132938       | -0.10876568      | 0.15305269       | -0.44039676      | -0.143672035 |
| A_01_P1800011 | A_01_P1800011     | 0.58968794        | 0.56650136        | 0.19551299       | 1.2671977        | 0.654613573  | -0.21301325      | 0.26757338       | 0.13788624       | -0.26328242      | -0.0626908   |
| A_01_P1772516 | A_01_P1772516     | 0.6656225         | 0.3663684         | 0.36174342       | 0.71594524       | 0.60174489   | 0.122006595      | 0.090471864      | -0.39208695      | 0.1177054        | -0.137190775 |
| A_01_P1807166 | A_01_P1807166     | 0.4788169         | 0.79296106        | 0.84714216       | 0.5780821        | 0.674250555  | 0.55279714       | -0.19873282      | -0.13478364      | -0.4132098       | -0.27399672  |
| A_01_P1801016 | A_01_P1801016     | 0.6667078         | 0.5797468         | 0.82766206       | 0.46891707       | 0.635307983  | 0.098679975      | -0.1874335       | No data availabl | 0.071817815      | 0.071817815  |
| A_01_P1723806 | ENSM0000000045908 | 0.5583204         | 0.46180877        | 0.80591904       | 0.8371051        | 0.665786303  | 0.18471117       | -0.15505858      | 0.014546491      | -0.06615431      | -0.02580391  |
| A_01_P1825366 | JV70284           | -0.32367852       | -0.3345883        | -1.0108453       | -1.0834511       | -0.688141088 | -0.27007985      | -0.2397292       | -0.29519746      | -0.3311232       | -0.03104257  |
| A_01_P1762136 | ENSM000000005053  | 0.5727488         | 0.34835252        | 0.65693796       | 0.70242774       | 0.570116755  | 0.002112635      | 0.44176972       | -0.20337038      | -0.3738018       | -0.28858609  |
| A_01_P1807441 | PTGER4            | 0.80593854        | 0.13189778        | 0.69272274       | 0.9319377        | 0.64062419   | -0.19457562      | -0.3152684       | 0.44231674       | -0.053486235     | 0.194415253  |
| A_01_P001393  | DBT               | -0.78353745       | -0.36925396       | -1.0249899       | -0.95898247      | -0.784189445 | -0.12211763      | -0.4817511       | 0.32437107       | -0.15437004      | -0.239730555 |
| A_01_P1763836 | ENSM0000000029550 | 0.64179885        | 0.35785747        | 0.7392917        | 0.66977966       | 0.60218192   | 0.16638148       | 0.007642238      | -0.06492904      | -0.12586194      | -0.09539549  |
| A_01_P1698341 | LOC711182         | 0.5787775         | 0.4486454         | 0.5676211        | 1.3845894        | 0.74867085   | -0.034501042     | 0.003061120      | -0.18957506      | -0.19489719      | -0.002661065 |
| A_01_P017578  | ACVR2B            | -0.89981765       | -1.1044145        | -0.6687383       | -1.0617656       | -0.933684013 | 0.25590253       | -0.85134095      | 0.34502319       | -0.02598247      | 0.159532472  |
| A_01_P1762461 | ENSM0000000041766 | 0.5941306         | 0.5074516         | 0.9133527        | 0.1626404        | 0.677134825  | -0.15885727      | -0.30814928      | -0.180831844     | -0.083184496     | 0.047811972  |
| A_01_P1732671 | A_01_P1732671     | 1.6073184         | 0.6809158         | 0.41229784       | 0.85082036       | 0.8878381    | No data availabl | 0.05463113       | No data availabl | -0.056781672     | -0.056781672 |
| A_01_P1678066 | ANKZF1            | -0.86634946       | -0.55437297       | -0.6827878       | -0.86896986      | -0.743120023 | -0.19698241      | -0.55189216      | 0.23978686       | 0.38877635       | 0.289281605  |
| A_01_P016558  | TMEM42            | -0.5891477        | -0.24305944       | -0.7999181       | -0.8671197       | -0.624811235 | -0.2524838       | -0.26387239      | 0.20384966       | 0.23806001       | 0.218827835  |
| A_01_P1687761 | CDHR2             | No data available | No data available | 1.4719191        | 1.6698289        | 1.570874     | 0.5895094        | 0.16582634       | -1.0053387       | -1.0052387       | -1.0052387   |
| A_01_P1682071 | MTRFD3            | -0.8252471        | -0.8788814        | -0.4117772       | -0.9031269       | -0.75475815  | 0.007067828      | -0.623716        | 0.34316537       | 0.10776143       | 0.2254634    |
| A_01_P1745581 | SOBP              | -1.0243043        | -0.6775845        | -0.7451274       | -0.33971103      | -0.696681558 | -0.10974036      | -0.5458104       | 0.19373606       | -0.008528669     | 0.235419696  |
| A_01_P1713971 | SPATZL2           | 0.8248335         | 1.3295687         | 0.9807377        | 1.4014454        | 1.134146325  | -0.22527295      | 0.48019933       | 0.10604977       | -0.4721893       | -0.183069762 |
| A_01_P1832591 | ENSM0000000027824 | 0.6502993         | 0.461011275       | 0.581004         | 0.63086855       | 0.58079615   | 0.25480172       | -0.11024662      | 0.17332487       | -0.40976876      | -0.118221945 |
| A_01_P014256  | ZNF267            | 0.74254894        | 0.16803072        | 1.4068012        | 1.6680282        | 0.996352265  | -0.11496317      | 0.31784344       | -0.7759505       | 0.31744808       | -0.22925121  |
| A_01_P1768896 | ENSM0000000045405 | 0.6895353         | 0.08373056        | 0.83717255       | 0.67894554       | 0.572346663  | 0.31149793       | -0.3088877       | 0.09447915       | -0.1778727       | -0.041651775 |
| A_01_P1682001 | LTA4H             | -1.3494827        | -0.89212954       | -1.10521121      | -1.308214        | -1.163759335 | 0.10544064       | -0.99100054      | 0.97593095       | -0.05282575      | 0.2633526    |
| A_01_P1726176 | ENSM0000000029419 | 0.7111186         | 0.4465177         | 1.0826977        | 0.85737075       | 0.774516188  | 0.35858467       | -0.25787243      | 0.064487375      | -0.2587724       | -0.097142513 |
| A_01_P1818681 | A_01_P1818681     | 0.6799362         | 0.4306205         | 0.9791387        | 0.25919308       | 0.587417413  | 0.12464655       | -0.01575262      | -0.11735766      | -0.15714644      | -0.07741461  |
| A_01_P1790991 | A_01_P1790991     | -0.8555974        | -0.63507545       | -0.49253705      | -1.1160527       | -0.77481565  | 0.04314146       | -0.27401412      | 0.35640648       | -0.213577        | -0.07741492  |
| A_01_P1778946 | EPN2              | -1.0020348        | -0.5457575        | -0.5649472       | -0.9706243       | -0.77084095  | 0.14647359       | -0.23060462      | 0.35377532       | -0.39031816      | -0.01827142  |
| A_01_P018960  | FFAR3             | 0.87989527        | 0.63799345        | 0.75274086       | 1.1321354        | 0.850691245  | -0.2810787       | 0.55746335       | -0.26769125      | -0.19314411      | -0.23041768  |
| A_01_P1772451 | NPC2              | 0.9392976         | 0.2537065         | 0.76868874       | 0.46403477       | 0.60684794   | -0.17029846      | -0.29090324      | 0.11756174       | 0.2738704        | 0.195718787  |
| A_01_P1734661 | ENSM0000000021685 | No data available | 1.1236756         | No data availabl | 0.7842889        | 0.95452255   | No data availabl | -0.5123756       | 0.36498383       | 0.015934102      | 0.009436466  |
| A_01_P1747431 | A_01_P1747431     | 0.73959994        | 0.5146736         | 1.0057498        | 1.0923289        | 0.8380157    | 0.28141576       | -0.35759205      | 0.117739156      | -0.121684946     | -0.001972895 |
| A_01_P1704506 | SCL7A9            | -0.65432596       | -0.56709206       | -1.5953249       | -1.5835181       | -1.100065255 | -0.03903129      | -0.23136395      | -0.30908042      | 0.4517587        | -0.17133914  |
| A_01_P1811391 | A_01_P1811391     | -1.827351         | -1.827351         | -0.642842        | -0.50368357      | -1.139161393 | -0.38970944      | -0.63008124      | 0.36099854       | 0.3854447        | 0.37321262   |
| A_01_P1751211 | C7H14orf79        | -0.6328047        | -0.16031565       | -0.8986677       | -0.9113007       | -0.650776955 | -0.43710536      | -0.21437612      | 0.2255249        | 0.2989676        | 0.26224625   |
| A_01_P1828821 | A_01_P1828821     | 0.61819696        | 0.10138435        | 0.6103649        | 0.1874328        | 0.60747016   | -0.31059775      | 0.44157648       | -0.36956868      | 0.08628244       | -0.141670218 |
| A_01_P1831631 | ENSM0000000046993 | 0.6963583         | 0.953053          | 0.74599767       | 0.91430134       | 0.827427578  | 0.3014521        | 0.06879189       | 0.08979205       | -0.60847896      | -0.260243455 |
| A_01_P1745006 | ENSM0000000040432 | 0.7441476         | 0.19758567        | 0.7427737        | 0.5657517        | 0.61027056   | 0.17027749       | -0.21321769      | 0.19460538       | -0.20472714      | -0.00506088  |
| A_01_P1825637 | ENSM0000000026870 | 0.62067366        | 0.6008107         | 0.92608184       | 0.13504383       | 0.57065245   | 0.16370986       | 0.29685685       | -0.46740198      | -0.107639976     | -0.287520978 |
| A_01_P002808  | GDF7              | 0.48691356        | 0.5448752         | 0.60189056       | 0.88717747       | 0.630214198  | -0.11246811      | 0.30007252       | -0.4407106       | 0.14667836       | -0.14701605  |
| A_01_P1762371 | IRF5              | 1.0043528         | 0.17857261        | 1.3985961        | 1.4574721        | 1.009741153  | 0.23885602       | 0.3137245        | -0.498322        | -0.24445213      | -0.346387065 |
| A_01_P1737151 | LOC712092         | 0.5842804         | 0.43970448        | 0.30556917       | 1.0849698        | 0.603630963  | -0.071692        | 0.45137754       | -0.13567013      | -0.3790825       | -0.255824765 |
| A_01_P1671421 | TLR4              | 1.1275063         | 0.54890657        | 1.2620816        | 1.5880059        | 1.131639875  | -0.44981512      | 0.2990280        | -0.36930104      | 0.5060739        | -0.09511357  |
| A_01_P1721826 | ENSM0000000046965 | 0.8871434         | 0.4619249         | 0.686608         | 0.9437887        | 0.74486225   | 0.3459029        | -0.27737015      | -0.08854062      | -0.053663563     | -0.071102092 |
| A_01_P1707843 | LOC718167         | 0.17474468        | 0.65134704        | 0.95173264       | 1.451003         | 0.80721684   | 0.12039626       | 0.028166428      | 0.19799203       | -0.422461        | -0.112234485 |
| A_01_P1767491 | ENSM0000000015968 | 0.7665103         | 0.14464144        | 1.0624657        | 0.6399174        | 0.65338371   | 0.21637864       | -0.31503302      | -0.1234394       | 0.15881321       | 0.17686905   |
| A_01_P001957  | GTF2I             | -0.6237722        | -0.63997045       | -0.63992584      | -0.69368416      | -0.646771675 | 0.09473992       | -0.58434784      | 0.0730782        | -0.27883822      | 0.17595821   |
| A_01_P1759156 | JV559215          | -1.2284987        | -0.7147873        | -0.43066517      | -0.8005352       | -0.793621593 | -0.16355394      | 0.00983562       | 0.25059998       | -0.13505577      | 0.057772045  |
| A_01_P1690521 | TMEM106B          | -0.42409948       | -0.31909648       | -0.8067687       | -0.9296237       | -0.635650415 | 0.2097477        | -0.16320157      | 0.23225798       | -0.36624166      | -0.06699184  |
| A_01_P1675776 | CACNB4            | -2.2674115        | -1.3072087        | -0.85669917      | -1.7470369       | -1.544589068 | -0.41085282      | -1.0826385       | 0.76690805       | 0.10304491       | 0.43497648   |
| A_01_P1694321 | ANKRD28           | -0.6584881        | -0.2531169        | -1.1269827       | -0.68606836      | -0.681164015 | 0.073821224      | -0.32276565      | 0.08336749       | -0.12308575      | 0.102838033  |
| A_01_P1781086 | A_01_P1781086     | -1.3803207        | -0.8457055        | -0.              |                  |              |                  |                  |                  |                  |              |

|               |                   |                   |                   |                   |                   |              |                   |              |                   |              |              |
|---------------|-------------------|-------------------|-------------------|-------------------|-------------------|--------------|-------------------|--------------|-------------------|--------------|--------------|
| A_01_P010035  | SLC22A11          | 0.79743516        | 0.487111          | 0.81714714        | 0.27342898        | 0.59378057   | -0.188033         | -0.16746271  | -0.19373831       | 0.44090325   | 0.12358247   |
| A_01_P1769516 | MDM4              | -1.0745484        | -0.46062604       | -1.1978531        | -0.5131912        | -0.811554685 | 0.1699826         | -0.38282067  | -0.14380845       | -0.26705298  | 0.06162265   |
| A_01_P1753351 | ENSMUT00000023823 | 0.5552911         | 0.2684679         | 0.9524015         | 0.61637026        | 0.59813269   | 0.15367758        | -0.0042062   | 0.04367082        | -0.21796623  | -0.087147705 |
| A_01_P1713536 | WDR59             | -0.5682606        | -0.17412819       | -0.9879786        | -0.75694287       | -0.621827565 | -0.08499396       | -0.062469836 | 0.06549059        | 0.074707255  | 0.070098923  |
| A_01_P1758771 | IFT80             | -0.58967173       | -0.5744349        | -1.0704027        | -0.6703293        | -0.726209658 | -0.08699284       | -0.5822314   | 0.10147312        | 0.08571914   | 0.24823113   |
| A_01_P000111  | KNV2              | 0.2694596         | 0.409689          | 1.0335779         | 0.733057          | 0.611445875  | 0.019431746       | 0.2302519    | -0.12171825       | -0.14827335  | -0.1349958   |
| A_01_P1759096 | DZIP1L            | -1.2062637        | -0.11032318       | -1.4714922        | -1.5975199        | -1.096507745 | -0.5704442        | -0.2397501   | 0.41894943        | 0.19250323   | 0.30572633   |
| A_01_P1744341 | TFEB              | 0.7603791         | 0.4502953         | 0.44064617        | 0.8890329         | 0.635088368  | 0.25621733        | -0.32815328  | 0.26383898        | -0.3061262   | -0.02137111  |
| A_01_P1793296 | A_01_P1793296     | -1.6652948        | -0.79230136       | -1.2784076        | -0.46041754       | -1.049105325 | 0.048715517       | -0.57305235  | 0.44861367        | -0.106660694 | 0.170976488  |
| A_01_P020008  | BBS10             | -0.4828843        | -0.6827751        | -0.8684206        | -0.9363519        | -0.741932975 | 0.09863822        | -0.4073062   | 0.30007053        | -0.123225376 | 0.103422577  |
| A_01_P1768722 | FCRLB             | 0.72083163        | No data available | 1.0559181         | No data available | 0.888374865  | -0.03347666       | -0.3876101   | 0.2816906         | 0.52188337   | 0.120096385  |
| A_01_P1721086 | ENSMUT00000015984 | -1.0260452        | -0.41195315       | -1.5375489        | -0.9309064        | -0.976613413 | -0.15758012       | -0.7440927   | 0.6148068         | -0.036413044 | 0.289196878  |
| A_01_P1786951 | JV482836          | -0.66355026       | -0.34365425       | -0.79404736       | -0.82557166       | -0.656705883 | -0.013333324      | -0.5466212   | 0.41721565        | -0.015622484 | 0.200796583  |
| A_01_P1801566 | A_01_P1801566     | -0.18278815       | -0.83671916       | -0.95351774       | -0.57853734       | -0.637890598 | 0.21525332        | -0.002332507 | -0.34497717       | 0.07503579   | -0.13497069  |
| A_01_P1832136 | ENSMUT0000008222  | 0.60226184        | 0.4187485         | 1.0067006         | 0.8321405         | 0.71496286   | 0.17377274        | -0.21178977  | 0.15464245        | -0.15942106  | -0.002389305 |
| A_01_P1766246 | NFIA              | -0.6819829        | -0.8366573        | -1.2399252        | -1.0539026        | -0.966617    | 0.35355943        | -0.16334476  | -0.013714642      | -0.25360182  | -0.133658231 |
| A_01_P1766736 | GBP1              | 1.6197687         | 0.65856135        | 1.3908887         | 0.73887086        | 1.610982588  | 0.44220838        | 0.6143171    | -0.12405776       | -0.54102826  | -0.89080293  |
| A_01_P002532  | JU476356          | -0.61486524       | -0.6849927        | -1.1809515        | -0.3699636        | -0.71269328  | -0.108425416      | -0.2919286   | 0.11138799        | 0.23306638   | 0.17222663   |
| A_01_P005593  | C5orf25           | -0.62920886       | -0.2230093        | -0.9986384        | -0.6573769        | -0.624814733 | 0.27963027        | 0.10235861   | -0.1443208        | -0.3079588   | -0.2261398   |
| A_01_P1700951 | APOLD1            | 0.68490267        | 0.120919056       | 0.7433159         | 0.9859001         | 0.633759432  | 0.20948683        | 0.23729196   | -0.34377733       | -0.1890414   | -0.266589365 |
| A_01_P009975  | ENSMUT00000027039 | 1.8737087         | 1.0953352         | 0.99498504        | 1.6594541         | 1.40587076   | 0.33601424        | 0.59922695   | -1.61483208       | -0.15715536  | -0.88701913  |
| A_01_P1672136 | CXCL10            | 2.0651662         | 0.68680066        | 1.6379244         | 1.7375029         | 1.53184854   | -0.08208804       | -1.1004368   | -0.9543508        | -1.3399261   | -1.1471845   |
| A_01_P1755846 | ENSMUT00000041754 | 0.647466          | 0.31642613        | 1.1719103         | 0.6751692         | 0.708042158  | 0.17362164        | -0.026359646 | -0.0886145        | -0.07331484  | -0.081464342 |
| A_01_P1700801 | ENSMUT00000039576 | -0.41013756       | -0.7002154        | -0.3365887        | -1.1170205        | -0.64099054  | 0.2933859         | -0.2813577   | 0.07524165        | -0.15499902  | -0.039878685 |
| A_01_P1832741 | A_01_P1832741     | -0.45437703       | -0.46297905       | -1.061674         | -0.789216         | -0.69206152  | 0.42912844        | -0.3729217   | 0.03971746        | -0.22862035  | -0.09451445  |
| A_01_P006724  | TMCC1             | -0.4549836        | -0.854459         | -0.62498605       | -0.7718373        | -0.676566488 | 0.1381749         | -0.51607627  | 0.0475791         | 0.22241846   | -0.13499878  |
| A_01_P003090  | SETD7             | -0.86532456       | -0.5865229        | -0.6362405        | -0.8432364        | -0.7328304   | 0.18831553        | -0.3928702   | 0.23452914        | -0.2400788   | 0.04225217   |
| A_01_P003459  | CYR61             | 1.0916303         | 0.22336896        | 0.6822303         | 1.0264138         | 0.75951084   | 0.040757768       | 0.50492066   | -0.2695388        | -0.4719505   | -0.36924459  |
| A_01_P1717821 | ENSMUT00000044245 | 0.81282693        | 1.0480103         | 1.53653395        | No data available | 0.79915406   | -0.54249287       | -0.086951554 | 0.36847115        | 0.11226307   | 0.24036711   |
| A_01_P005145  | NLRP3             | 0.74571496        | 0.38181725        | 1.3908887         | 0.73887086        | 0.814322943  | -0.22479886       | 0.7043627    | -0.51821434       | -0.29226226  | -0.05263813  |
| A_01_P1743056 | CAP2              | -1.219795         | -0.46783113       | -0.8738126        | -1.1486225        | -0.927515308 | -0.19740593       | -0.6716412   | 0.5444362         | 0.08585698   | 0.30164659   |
| A_01_P1674921 | KRT20             | -1.1213442        | No data available | No data available | -0.88224703       | -1.001795615 | No data available | -0.34866627  | -0.016472103      | 0.29420143   | 0.138864664  |
| A_01_P1719466 | FIGN              | -0.9985614        | -0.7469505        | -0.9437663        | -1.0458272        | -0.933776525 | 0.24211068        | -0.7947095   | 0.24279999        | 0.08050024   | 0.161740115  |
| A_01_P1680466 | ZNF33B            | -0.23182517       | -0.7517991        | -0.956935         | -1.1092279        | -0.762446618 | 0.20930447        | -0.6138308   | 0.17262879        | 0.09483878   | 0.136056285  |
| A_01_P1831421 | ENSMUT00000041797 | 0.54394776        | 0.21443103        | 0.91767764        | 0.6616563         | 0.584428183  | 0.22855362        | -0.03296007  | 0.016439361       | -0.2524534   | -0.1180072   |
| A_01_P1810941 | CRP1              | -0.7501315        | -0.368128         | -0.60028506       | -1.1919928        | -0.74263434  | 0.00943176        | -0.3911874   | 0.48869962        | -0.27271602  | 0.1079918    |
| A_01_P1789211 | A_01_P1789211     | -0.70752966       | -0.5539006        | -1.0522265        | -1.1355243        | -0.862295265 | 0.023062265       | -0.4495922   | 0.55486375        | -0.35364115  | 0.1006113    |
| A_01_P1768831 | WNT3A             | 1.1164403         | 0.2266519         | 0.8792282         | 0.3648356         | 0.646782323  | 0.16771352        | -0.22587371  | -0.25637275       | 0.24422444   | -0.006074155 |
| A_01_P1798321 | LOC723103         | 1.4269447         | 0.9975291         | 0.31314543        | 0.7955873         | 0.883301633  | -0.29064438       | 0.04115262   | -0.72522914       | 0.6309895    | -0.04711982  |
| A_01_P1746786 | MLLT4             | -1.0146756        | -1.369189         | -1.1174943        | -1.18092          | -1.145569725 | 0.1829094         | -0.6536889   | 0.17312552        | 0.13970232   | 0.15641392   |
| A_01_P1729366 | ENSMUT00000042879 | 0.70073664        | 0.4557026         | 0.46359685        | 0.71789217        | 0.58482065   | 0.22654626        | -0.15627864  | 0.043322552       | -0.14856347  | -0.052620459 |
| A_01_P1799811 | A_01_P1799811     | -1.2789925        | -0.692154         | -0.69016427       | -0.87178534       | -0.883274028 | 0.03710636        | -0.14782809  | -0.2544867        | 0.302233825  | 0.023873825  |
| A_01_P1803486 | GRM8              | 1.010047          | No data available | 0.75910495        | No data available | 0.884577475  | -0.33231024       | 0.16443421   | No data available | 0.11103003   | 0.11101003   |
| A_01_P1775046 | A_01_P1775046     | 0.6402488         | 0.39348996        | 1.7010149         | 1.6561643         | 1.09772949   | -0.54545206       | 0.3281421    | -0.63137805       | 0.49964762   | -0.05865215  |
| A_01_P1803846 | LOC713120         | -0.52522385       | -0.74704707       | -0.5286658        | -0.99569845       | -0.699158793 | -0.12398496       | -0.07196486  | 0.1593386         | 0.20390298   | 0.089864449  |
| A_01_P1704461 | ENSMUT00000038595 | 0.76366717        | 0.31549165        | 1.3671702         | 0.618539          | 0.766217005  | 0.18163894        | -0.25707475  | 0.026189758       | 0.030126918  | 0.028158338  |
| A_01_P1792181 | A_01_P1792181     | -0.9930542        | -1.048704         | -0.7726349        | -0.815575         | -0.907492025 | 0.2993865         | -0.6432755   | 0.275773          | -0.1268179   | 0.076545605  |
| A_01_P006569  | RAX               | 2.1525888         | 0.9324876         | 3.2205602         | 2.305148          | 2.15264935   | -0.30917          | 0.7488559    | -0.40783554       | -0.33845544  | -0.40464549  |
| A_01_P1726736 | ENSMUT00000043863 | -0.7521098        | -0.66643476       | -0.82432103       | -1.1271603        | -0.842506473 | -0.016760988      | -0.23505999  | -0.13547935       | 0.32369718   | 0.094108915  |
| A_01_P1822371 | MYT1L             | No data available | 0.7632013         | 0.58024853        | 0.36424637        | 0.569232067  | 0.109355636       | 0.052431732  | -0.5183147        | 0.24617113   | -0.136071785 |
| A_01_P1798176 | ENSMUT00000025957 | -0.33183035       | -0.91149884       | -1.3530877        | -1.1495684        | -0.936496323 | 0.24660102        | -0.39838108  | 0.38979515        | -0.42531708  | -0.017760965 |
| A_01_P1786646 | A_01_P1786646     | No data available | -1.8913931        | No data available | -1.976131         | -1.93376205  | 0.3147048         | -0.5623707   | 0.49286526        | -0.57388584  | -0.0049657   |
| A_01_P1779761 | A_01_P1779761     | 0.63433826        | 0.19490351        | 1.4626935         | 1.2542788         | 0.886553518  | -0.36664665       | 0.076408364  | -0.39484718       | 0.49513954   | 0.05014618   |
| A_01_P1720626 | ENSMUT00000025199 | -0.7428907        | -0.9401539        | -1.1626273        | -1.3649567        | -1.05256715  | 0.577501          | -0.5742295   | 0.10476222        | -0.39445662  | -0.1448472   |
| A_01_P1734641 | ENSMUT00000045333 | -1.6311492        | -0.8808545        | -0.70053834       | -0.81135654       | -1.005974645 | 0.13064975        | -0.3264575   | 0.21484973        | -0.078353435 | 0.068248148  |
| A_01_P1692796 | NLRP3             | 0.694873          | 0.481965          | 0.9768005         | 1.2301939         | 0.872765975  | 0.18231933        | 0.2657279    | -0.98377234       | 0.21088147   | -0.386445435 |
| A_01_P1754241 | ENSMUT00000042442 | 0.56715953        | 0.3907666         | 0.8268812         | 0.6092842         | 0.619222883  | 0.14548613        | -0.2920936   | 0.1875158         | -0.091754906 | 0.047800447  |
| A_01_P1705296 | LOC706835         | 0.70984894        | 0.8772683         | 1.0148902         | 0.9277289         | 0.882434118  | -0.5223956        | -0.7593337   | -0.34578627       | -0.27893806  | -0.312362118 |
| A_01_P011152  | PER1              | -1.3461703        | -0.9094737        | -0.392305         | -0.44778532       | -0.773933605 | -0.3025754        | -0.3572718   | 0.28376716        | 0.25239995   | 0.268083075  |
| A_01_P1710171 | ENSMUT00000041229 | 0.6742909         | 0.34809476        | 1.7144829         | 0.75503975        | 0.622977078  | 0.22105367        | -0.24035517  | 0.1308918         | -0.16086052  | -0.01498436  |
| A_01_P006017  | LACTB             | 0.78859836        | 0.56569874        | 0.9011729         | 1.0800056         | 0.8338689    | -0.23003225       | 0.7216199    | -0.57183326       | -0.14480250  | -0.4483179   |
| A_01_P1750496 | ENSMUT00000039664 | 0.6440293         | 0.69603897        | 0.89976284        | 0.5840451         | 0.705469285  | 0.18448615        | 0.14106062   | -0.09221592       | -0.18410098  | -0.18680845  |
| A_01_P002317  | CNTN5             | 0.9654539         | 0.6231186         | 1.214209          | No data available | 0.9342605    | 0.13917083        | -0.24447638  | -0.4811471        | 0.04208883   | -0.030426435 |
| A_01_P1832536 | A_01_P1832536     | 0.8261369         | 0.16740574        | 1.0118321         | 0.7558422         | 0.690304235  | 0.14556699        | -0.27591836  | 0.08523466        | 0.010135027  | -0.031848444 |
| A_01_P1720886 | HEATR7B1          | 0.9360415         | 0.7100665         | 0.7831199         | No data available | 0.809742633  | -0.20731832       | 0.12515677   | 0.13128565        | 0.30805235   | -0.00239165  |
| A_01_P1793516 | JV14676           | -0.37149662       | -1.0597844        | -1.1015588        | -1.9453855        | -1.11955633  | 0.11335063        | -0.2848447   | -0.37464464       | 0.5379749    | 0.08266513   |
| A_01_P1807791 | A_01_P1807791     | -0.7064342        | -0.8980772        | -0.9543392        | -1.0536567        | -0.903067425 | -0.16732155       | -0.035655696 | -0.1178967        | 0.27784514   | 0.07977735   |
| A_01_P1723716 | ENSMUT00000045954 | 0.5757578         | 0.67745364        | 1.0431304         | 0.72683203        | 0.755793468  | 0.25753444        | -0.05770762  | -0.030762982      | -0.20943792  | -0.120100451 |
| A_01_P1808042 | ENSMUT00000022069 | 0.74687386        | 0.57987916        | 0.32637915        | 0.95919085        | 0.653080755  | 0.014620041       | 0.22427566   | -0.7307467        | 0.28         |              |

|                   |                   |                   |                   |                   |                   |               |                   |                   |                   |                   |              |
|-------------------|-------------------|-------------------|-------------------|-------------------|-------------------|---------------|-------------------|-------------------|-------------------|-------------------|--------------|
| A_01_P1820976     | A_01_P1820976     | -1.4222295        | -0.96483105       | -0.60947007       | -0.5337657        | -0.88257408   | 0.5874833         | -0.37090078       | -0.29010373       | -0.14204416       | -0.02450707  |
| A_01_P1712156     | ABCA15            | 0.64761364        | 0.7812022         | 0.9451589         | No data available | 0.791324913   | 0.2245277         | -0.31126884       | 0.5070501         | -0.7261108        | 0.140102987  |
| A_01_P014485      | A_01_P014485      | -0.67891765       | -0.57144636       | -0.9349182        | -0.24041279       | -0.60642375   | -0.33364227       | -0.027853254      | 0.16998884        | 0.13820273        | -0.063822128 |
| ENSMMU00000006981 | ENSMMU00000006981 | 0.93933403        | 0.8515346         | 0.5373297         | 1.5863378         | 0.978634033   | No data available | 6.26E-04          | No data available | 6.26E-04          | -0.000626653 |
| A_01_P1697076     | CA3               | -1.3981918        | No data available | -1.5620351        | No data available | -1.48011345   | -0.65041465       | 0.43463624        | No data available | 0.016257754       | -0.10789205  |
| A_01_P1795681     | LOC706220         | -0.575372         | -0.22511715       | -1.169957         | -0.8572086        | -0.706913688  | -0.063562535      | 0.1306909         | -0.06620464       | 0.000307908       | -0.000307908 |
| A_01_P1814071     | LOC695694         | No data available | No data available | 0.5523288         | 0.6943086         | 0.62327378    | -0.5096244        | -0.19115059       | 0.10351513        | 0.4300708         | -0.19908662  |
| A_01_P1684921     | USP49             | 0.3560895         | 1.7688469         | 0.7621587         | 1.7034679         | 1.14764       | No data available | No data available | -0.08109992       | 0.07678266        | -0.08109992  |
| A_01_P018971      | TBX20             | -0.43744954       | -1.1513064        | -1.0359081        | No data available | -0.874888013  | -0.27736506       | No data available | 0.14103535        | 0.10058358        | -0.068164855 |
| A_01_P013692      | RHOV              | -1.5709522        | -1.3317584        | -2.3908136        | -0.98527646       | -1.569700165  | -1.0458056        | 0.9991603         | -0.30258197       | -0.50228155       | -0.11649099  |
| A_01_P1677611     | CSRNP3            | 0.49197283        | 0.702135          | 1.0685365         | 0.35253784        | 0.653795543   | 0.3783327         | -0.14446338       | -0.11922093       | -0.19303942       | -0.03821613  |
| A_01_P1773996     | LOC707117         | -0.93733853       | -0.6693458        | -0.93996924       | No data available | -0.848884523  | No data available | No data available | -0.09792368       | 0.09169735        | -0.09792368  |
| A_01_P1818431     | A_01_P1818431     | -1.9253072        | No data available | -1.7172078        | -1.1384932        | -1.5936694    | -0.4602048        | 0.21391615        | No data available | 0.15482244        | -0.123144325 |
| A_01_P1780421     | LOC709567         | -0.5992387        | No data available | -0.7008705        | No data available | -0.6500546    | -0.077696346      | 0.1231478         | -0.14851296       | 0.08561785        | -0.03453835  |
| A_01_P1760071     | DYRK1A            | -0.89017475       | -0.5810296        | -1.2975526        | -0.2595219        | -0.757069713  | 0.13920346        | 0.12951148        | -0.40316987       | 0.068443894       | -0.04481831  |
| A_01_P1690961     | RGS12             | -0.83581424       | -1.284065         | -0.8791301        | -1.3106413        | -1.07741266   | -0.3818935        | -0.17869690       | -0.5549001        | 0.73843205        | -0.371828097 |
| A_01_P1821781     | A_01_P1821781     | -0.66716933       | -0.8069802        | -0.6802142        | -0.8191495        | -0.743378308  | -0.47815433       | -0.032829337      | -0.01467958       | 0.39477694        | -0.175227208 |
| A_01_P1804706     | A_01_P1804706     | -1.2823639        | -0.57338536       | -1.0487553        | No data available | -0.967874853  | No data available | -0.173426         | 0.035067806       | 0.12255245        | -0.069179057 |
| A_01_P1777832     | A_01_P1777832     | -1.3628724        | -1.3586901        | -1.2685245        | -1.2926435        | -1.670682625  | -0.8681953        | 1.1034514         | -0.6576756        | -0.57867736       | -0.140798167 |
| A_01_P009113      | SERPINA6          | -0.7483694        | -0.59971803       | -0.9944695        | -0.5683806        | -0.727734383  | -0.06807675       | 0.32568867        | -0.27748135       | -0.04722877       | -0.0662071   |
| ENSMMU00000029617 | ENSMMU00000029617 | -0.65745527       | -0.25340614       | -0.90717816       | -1.02572756       | -0.710828793  | 0.13606115        | 0.04172181        | -0.44524464       | 0.18561016        | -0.089153893 |
| A_01_P1793996     | A_01_P1793996     | 1.5140696         | 1.7472161         | No data available | No data available | 1.63064285    | No data available | No data available | -0.02014868       | 0.019870985       | -0.02014868  |
| A_01_P1743451     | ENSMMU00000041217 | 0.8464081         | No data available | 0.8924645         | No data available | 0.8694363     | 0.26453766        | No data available | -0.11218776       | -0.19501291       | -0.07617495  |
| A_01_P1699586     | ENSMMU00000039139 | -0.36304575       | -0.7871921        | -0.6569215        | -0.60187376       | -0.602258278  | No data available | No data available | 0.100748144       | -0.10831557       | 0.100748144  |
| A_01_P1695064     | AF162473          | No data available | 2.5722017         | 1.3011588         | 2.2323215         | 2.035527333   | No data available | -0.48939512       | -1.0923225        | 0.8609724         | -0.78857881  |
| A_01_P1792096     | A_01_P1792096     | 0.56537455        | No data available | 0.8255498         | No data available | 0.695462175   | -0.105502024      | -0.29450038       | 0.30138984        | -0.03257043       | -0.03257043  |
| A_01_P1803921     | A_01_P1803921     | -0.3471512        | -0.46980992       | -0.71952415       | -0.91351519       | -0.612409293  | -0.083260104      | -0.17454612       | 0.38763005        | -0.21459323       | 0.043274609  |
| A_01_P1791936     | A_01_P1791936     | -1.0041022        | -0.45165408       | -1.20619443       | No data available | -0.88755686   | No data available | 0.08209364        | No data available | -0.08704837       | 0.08209364   |
| A_01_P1687811     | ENSMMU00000042458 | 1.039802          | 1.3670415         | 1.0069901         | 0.909853          | 1.08092165    | 0.18104501        | 0.3856481         | -0.69551456       | -0.08555027       | -0.024940833 |
| ENSMMU00000043121 | ENSMMU00000043121 | 0.44461733        | 0.8653391         | 1.0397385         | 0.6046272         | 0.738580533   | 0.56041014        | -0.5112227        | -0.05519752       | -0.21554387       | -0.00200336  |
| A_01_P1815831     | PFKM              | -1.0087411        | -0.60766137       | -1.2253595        | -1.7180176        | -1.364989893  | 0.54636735        | -0.35232595       | 0.27358457        | -0.8691528        | 0.155875383  |
| A_01_P1759676     | ENSMMU00000029122 | 0.7466233         | 0.55354726        | 1.0675579         | No data available | 0.78924282    | No data available | No data available | 0.15126945        | -0.16900828       | 0.15126945   |
| A_01_P1729611     | ENSMMU00000020663 | -0.6238424        | -0.9580924        | -1.6422362        | -0.5895734        | -0.9534361    | 0.1544986         | -0.18105648       | 0.26417097        | -0.3147992        | 0.079204363  |
| A_01_P1798276     | LOC720011         | 0.6898666         | 1.0802871         | 0.3983552         | 1.3964297         | 0.90173965    | -0.26090372       | -0.38423645       | 0.48465452        | No data available | -0.053495217 |
| A_01_P014774      | LOC716941         | -1.024529         | -0.5279443        | No data available | -1.096745         | -0.883072767  | 0.24275094        | No data available | -0.21181367       | -0.06899185       | 0.015467285  |
| A_01_P1805041     | A_01_P1805041     | 1.3896552         | 0.24639732        | 0.9977706         | 0.79605556        | 0.85746967    | 0.36619812        | No data available | -0.17667048       | -0.07925808       | 0.09476382   |
| A_01_P1735556     | ENSMMU0000004681  | -0.3424365        | -0.6205501        | -0.966854         | -0.7226877        | -0.66313363   | 0.2384403         | -0.06357107       | -0.23323828       | 0.01816061        | -0.01945635  |
| A_01_P1786861     | ENSMMU00000008579 | 0.5896994         | 0.8040427         | 1.0274775         | 1.0330579         | 0.863569375   | No data available | 0.13095792        | -0.15818067       | 0.012676024       | -0.013611375 |
| A_01_P1760021     | LOC100425634      | No data available | -1.3950106        | -1.3548994        | -0.8742728        | -1.208060933  | No data available | 0.13538505        | No data available | -0.14941807       | 0.13538505   |
| A_01_P1727151     | LOC695364         | 0.7431235         | No data available | 0.8763295         | No data available | 0.790378225   | -0.003500651      | No data available | 0.2688307         | -0.32559627       | 0.13243986   |
| A_01_P1801746     | LOC705516         | 2.2771704         | No data available | No data available | 2.2365375         | 2.25685395    | -0.36213407       | No data available | -0.28452298       | 0.48643023        | -0.323282525 |
| A_01_P1707561     | ENSMMU00000048173 | 0.72825           | 0.58461106        | 0.80334306        | 0.65935695        | 0.693890268   | 0.5975194         | -0.13121513       | -0.57331973       | -0.14919329       | -0.03567062  |
| A_01_P1738076     | ANK1              | 0.83959776        | 0.56303227        | 0.6044703         | 0.79959863        | 0.701674474   | No data available | 0.026145676       | 0.16237749        | -0.12326624       | 0.094261583  |
| A_01_P1808936     | LOC722744         | 0.8685058         | No data available | 0.65648574        | 0.37459406        | 0.6331952     | 0.10942945        | No data available | No data available | -0.11841587       | 0.10942945   |
| A_01_P1670711     | MBL2              | -0.9075203        | -0.3772026        | -0.6101035        | -0.8403131        | -0.683784875  | No data available | -0.33483067       | -0.06216429       | 0.32111597        | -0.19849748  |
| A_01_P1697656     | UI0911            | -0.8450728        | -1.2845701        | -0.87902546       | No data available | -1.002949453  | 0.094304696       | -0.43322405       | 0.40929488        | -0.34856668       | 0.051056709  |
| A_01_P1813016     | A_01_P1813016     | -0.0999871        | -0.8668495        | -1.34104842       | -1.125417         | -0.810825505  | -0.23280229       | -0.10773309       | 0.3194417         | -0.03929981       | -0.007031227 |
| A_01_P1739916     | DDX53             | No data available | 2.359405          | 1.4465365         | 1.9074924         | 1.904486967   | -0.32445854       | 0.18823507        | 0.08628627        | No data available | -0.01646933  |
| A_01_P1762721     | ENSMMU00000009202 | -0.38879427       | -0.61191313       | -1.0551167        | -1.0355723        | -0.772353643  | No data available | 0.0810011         | -0.43470368       | 0.26592016        | -0.17685129  |
| A_01_P001202      | CYLC2             | 0.84119636        | 1.0255157         | 1.3762499         | No data available | 1.08098732    | No data available | No data available | 0.024106059       | -0.024551703      | 0.024106059  |
| A_01_P1751626     | PRLR              | 1.510203          | 1.2903937         | 2.1869962         | 1.7569149         | 1.68612695    | No data available | 0.3115503         | 0.02560706        | -0.42545128       | 0.166055503  |
| A_01_P1818591     | LOC710563         | 0.91998714        | 0.1088516         | 0.68376607        | 1.1009475         | 0.703388078   | No data available | 0.22978276        | -0.1313531        | -0.12916066       | 0.04921708   |
| A_01_P1707471     | ENSMMU00000029385 | -2.306353         | -2.3375301        | -2.28273          | No data available | -2.31695133   | No data available | 0.38587755        | -0.48465073       | 0.031097533       | -0.04938659  |
| A_01_P1793696     | A_01_P1793696     | -1.3760277        | -1.3902012        | -1.3054779        | -2.9902353        | -1.765485525  | -0.20148617       | 0.8090632         | -0.5087824        | -0.5660642        | 0.032931543  |
| A_01_P1807196     | A_01_P1807196     | 1.0407616         | 0.7725843         | 1.101683          | 0.5398146         | 0.863710875   | -0.7441048        | 0.23912504        | 0.26617432        | 0.02866927        | -0.079601813 |
| A_01_P1713121     | LOC696623         | 0.9442503         | 0.3335142         | 0.36644871        | 0.79170454        | 0.608489035   | No data available | -0.25455807       | 0.1688707         | 0.053244475       | -0.042859    |
| A_01_P1784776     | A_01_P1784776     | No data available | No data available | -1.2390972        | -0.202876         | -2.0839416    | No data available | -0.076828654      | -0.6178164        | 0.48159587        | -0.344325227 |
| A_01_P1797251     | A_01_P1797251     | -1.3217572        | -1.5099862        | -1.4223567        | -1.0914378        | -1.241384475  | 0.4315235         | -0.5363001        | 0.030691044       | -0.08879968       | -0.024695185 |
| A_01_P1775606     | CN643927          | 1.0405066         | No data available | 2.0816998         | 2.0180671         | 1.7134245     | -0.34352177       | -0.30719957       | 0.33253133        | 0.19466803        | -0.10663337  |
| A_01_P1772756     | CN804216          | -0.6210403        | -0.33948642       | -0.85675555       | No data available | -0.605760757  | 0.075193495       | No data available | No data available | -0.079329036      | 0.075193495  |
| A_01_P1729086     | ENSMMU00000021136 | 0.25208026        | 0.7901662         | 1.0975862         | 1.0542532         | 0.798521465   | 0.31516975        | -0.5161725        | 0.48780018        | -0.6119478        | 0.095599143  |
| A_01_P1821091     | A_01_P1821091     | 0.80053115        | No data available | No data available | 1.247255          | 1.023893075   | 0.41323254        | 0.46664196        | -0.66299134       | -0.6107038        | 0.072294387  |
| A_01_P1713146     | ENSMMU00000025441 | 1.0404717         | 0.3173077         | 1.1142353         | 1.4812992         | 0.988328475   | 0.31583214        | 0.2457304         | 0.13362686        | -1.0815237        | 0.2317928    |
| A_01_P1728171     | CALML5            | -1.3237413        | -0.7285509        | -0.88025796       | -0.73303807       | -0.916397058  | 0.11352757        | 0.514607          | -0.82136494       | -0.11463122       | -0.064410123 |
| A_01_P1773881     | CB311194          | 0.6443306         | 0.47813982        | 0.8588409         | 0.4389174         | 0.605057195   | -0.22858801       | 0.19577394        | No data available | 0.001718287       | -0.016407035 |
| A_01_P1734666     | ENSMMU00000045322 | 1.2345903         | No data available | 0.647468          | -0.7407804        | 1.096622233   | -0.4079891        | -0.35256815       | 0.6028769         | -0.03253623       | -0.052560117 |
| A_01_P005838      | PDE11A            | -1.2272416        | No data available | -0.9581833        | -0.77336204       | -0.986262313  | 0.54104966        | -0.56373826       | 0.1361657         | 0.6203044         | -0.322872723 |
| A_01_P1771741     | CN641463          | -2.0120344        | -1.1531754        | -1.8571141        | No data available | -1.674116967  | 0.91556543        | -0.03730894       | -1.1952229        | -0.5094261        | -0.105655421 |
| A_01_P000391      | CBFA2T3           | -1.0629333        | -1.4912595        | -1.9186286        | -0.253814         | -1.63165885   | 0.19743584        | 0.2773514         | 0.35686257        | -1.4709852        | 0.277216603  |
| A_01_P1777296     | JU481278          | 1.1220015         | 0.8091538         | 1.26824           | 0.55311245        | 0.938126938   | 0.36558157        | -0.6698556        | 0.5048112         | -0.5905456        | 0.066845723  |
| A_01_P1826826     | ENSMMU00000048347 | -1.0070775        | -0.51274186       | -0.34699753       | -0.6375102        | -0.626081773  | -0.36780006       | 0.35076118        | 0.11482433        | -0.20596239       | 0.03295515   |
| A_01_P014152      | CCR8              | -0.9782994        | No data available | -1.3286645        | No data available | -1.15348195</ |                   |                   |                   |                   |              |

|               |                   |                   |                  |                  |                  |              |                 |                  |                  |                 |              |
|---------------|-------------------|-------------------|------------------|------------------|------------------|--------------|-----------------|------------------|------------------|-----------------|--------------|
| A_01_P016220  | HAO2              | 0.89149255        | 1.8720475        | 0.7086823        | 2.6706758        | 1.535724538  | No data availab | No data availabl | 0.03313982       | -0.033919178    | 0.03313982   |
| A_01_P1704411 | ENSMUT00000002288 | -0.9709116        | No data availabl | -0.73437095      | No data availabl | -0.852641275 | 0.03559636      | -0.3334602       | 0.24048376       | No data availab | -0.019126693 |
| A_01_P1723266 | BNC2              | 0.5768253         | 0.44359642       | 1.0538962        | 0.22987115       | 0.576047268  | 0.13557638      | -0.025495958     | 0.2653362        | -0.479815       | 0.125138874  |
| A_01_P1703971 | KCN11             | No data available | 1.6320027        | 1.3048719        | 1.3570414        | 1.431305333  | No data availab | No data availabl | -0.20858659      | 0.18220307      | -0.20858659  |
| A_01_P1754156 | BTNL3             | 1.1739347         | 1.2894206        | 2.0104518        | No data availabl | 1.491269033  | No data availab | No data availabl | -0.025317943     | 0.024881288     | -0.025317943 |
| A_01_P1801821 | A_01_P1801821     | 0.5250809         | 0.7308702        | No data availabl | 0.5109202        | 0.5889571    | -0.22818767     | No data availabl | 0.20792319       | -0.012651492    | -0.01013224  |
| A_01_P007208  | GA52              | No data available | 1.1019422        | 1.3204386        | No data availabl | 1.2111904    | No data availab | No data availabl | 0.1497262        | -0.16708401     | 0.1497262    |
| A_01_P1707556 | ENSMUT00000048174 | 0.5779518         | 0.7424344        | 0.8708068        | 0.68860364       | 0.719949095  | 0.17221491      | 0.02031043       | -0.3055521       | 0.0702556       | -0.037675587 |
| A_01_P002531  | PROKR1            | -1.2348493        | -1.1092459       | No data availabl | No data availabl | -1.1720476   | No data availab | No data availabl | 3.26E-04         | -3.26E-04       | 0.000325698  |
| A_01_P006712  | STAR6             | 1.4449366         | 2.011614         | 2.5492957        | 2.4498098        | 2.113914025  | -0.30965507     | -0.41023228      | -0.46471977      | 0.7790927       | -0.39486904  |
| A_01_P1714006 | ENSMUT00000043511 | 0.6547033         | No data availabl | 0.5765185        | 1.1631463        | 0.7981227    | No data availab | -0.08593017      | 0.19556941       | -0.13187113     | 0.05481962   |
| A_01_P1711406 | ENSMUT0000004399  | -0.38344228       | -0.5365562       | -0.7686755       | -0.71473294      | -0.60085173  | -0.17846179     | 0.109691516      | -0.1932376       | 0.21750027      | -0.087355958 |
| A_01_P002962  | A_01_P002962      | -0.78758705       | -2.9551954       | -0.9053915       | -2.8681617       | -1.879083913 | 0.16985574      | -0.20563214      | -0.78785986      | 0.5146955       | -0.27454542  |
| A_01_P1732266 | SLC38A4           | -1.1519006        | -0.46564096      | -0.7859344       | -1.2432863       | -0.911690565 | No data availab | -0.31054774      | -0.26764852      | 0.44677728      | -0.28909813  |
| A_01_P1775131 | COS79551          | -0.9441781        | No data availabl | -2.264945        | -2.1950557       | -1.801392933 | No data availab | -0.29622008      | 0.09664857       | 0.15876406      | -0.099785955 |
| A_01_P001279  | ENSMUT00000026385 | No data available | -2.3323717       | -2.422753        | No data availabl | -2.37756235  | -0.002158535    | 0.002155396      | No data availabl | No data availab | -1.5695E-06  |
| A_01_P1779373 | A_01_P1779373     | 0.45116016        | 0.79159665       | 0.52729315       | No data availabl | 0.590016653  | No data availab | -0.1434131       | -0.073700294     | 0.19462627      | -0.108566697 |
| A_01_P1734651 | ENSMUT00000045330 | -0.44792584       | -1.5291055       | -0.8551213       | -0.69219637      | -0.881087253 | No data availab | -0.35045853      | -0.11647806      | 0.37097695      | -0.233468295 |
| A_01_P003674  | CLDN17            | -0.45780614       | -1.4659092       | -2.1440322       | -1.7162234       | -1.445992735 | No data availab | -0.15474522      | -0.2685116       | 0.34656945      | -0.21162841  |
| A_01_P1800866 | LOC697340         | No data available | 1.4502363        | 1.0930861        | No data availabl | 1.2716612    | 0.477117524     | -0.17991017      | -0.5792971       | 0.07852367      | -0.094010677 |
| A_01_P1781086 | A_01_P1781086     | 1.4847002         | 1.7165345        | 1.9334384        | No data availabl | 1.7115577    | 0.4680096       | -0.2673685       | 0.29323125       | -0.8349952      | 0.164624117  |
| A_01_P1738041 | IDO2              | No data available | -1.6286066       | -2.1575065       | -0.873875        | -1.553329367 | No data availab | 0.26974365       | -0.014307087     | -0.31424055     | 0.127718282  |
| A_01_P1701951 | LOC712423         | 0.6034914         | 0.6375573        | 0.666483         | 0.31221047       | 0.554935543  | 0.02857823      | -0.1825383       | 0.3173073        | 0.410581        | -0.177070967 |
| A_01_P005074  | DDX25             | 2.1452723         | 1.7615719        | 2.0277405        | 0.94132537       | 1.718977518  | No data availab | 0.7538551        | -0.9071906       | -0.35755768     | -0.07666775  |
| A_01_P1720751 | ENSMUT00000044433 | -0.79035836       | -0.4559433       | -1.572261        | -1.3237593       | -1.03558049  | 0.36014998      | -0.3115405       | 0.28557083       | -0.53164107     | 0.111393477  |
| A_01_P1689406 | ARL14             | -1.8005189        | -1.3361123       | No data availabl | -1.520364        | -1.552331733 | No data availab | 0.17622826       | No data availabl | -0.20078984     | 0.17622826   |
| A_01_P1773036 | JV574062          | 0.60303086        | 0.44173262       | 1.1515028        | 0.94750494       | 0.875942805  | 0.46091065      | -0.055813596     | -0.15539326      | -0.38901618     | 0.083234598  |
| A_01_P1706621 | ENSMUT00000038323 | 0.5399504         | 1.1008866        | 0.97326356       | No data availabl | 0.871366853  | 0.039756108     | -0.024313373     | 0.38246927       | -0.5454021      | 0.132637335  |
| A_01_P009386  | ZNF543            | No data available | 0.97821784       | 0.9746801        | 0.988108         | 0.980335313  | -0.18403201     | -0.13729057      | 0.35854283       | -0.10717364     | 0.01240675   |
| A_01_P1746016 | SLC35D3           | 0.5310837         | 1.3469946        | 1.3118092        | No data availabl | 1.063295833  | 0.019848084     | -0.08157483      | 0.50802696       | -0.6919471      | 0.148766738  |
| A_01_P1821651 | A_01_P1821651     | 0.49799895        | 0.85921437       | 0.49373296       | No data availabl | 0.616982093  | 0.118571386     | No data availabl | -0.23111312      | 0.087277494     | -0.056270867 |
| A_01_P1672721 | CHRN3             | 0.77484214        | 1.0357561        | 1.5423781        | No data availabl | 1.11765878   | No data availab | 0.050193254      | -0.68433034      | 0.42470914      | -0.317068543 |
| A_01_P1717051 | ENSMUT00000044594 | 1.2186583         | 0.87085795       | 0.6666112        | No data availabl | 0.952042483  | 0.28343883      | -0.8890377       | -0.1165021       | 0.40109736      | -0.24070036  |
| A_01_P1717821 | ENSMUT00000044245 | -1.2180566        | -1.137571        | -0.75860757      | -0.91223323      | -1.0066171   | No data availab | 0.049104374      | -0.14530917      | 0.08568559      | -0.048102398 |
| A_01_P1715251 | ENSMUT00000024823 | 0.26178792        | 1.085074         | 0.7350448        | 0.3042896        | 0.59654908   | -0.30862984     | 0.32393876       | -0.001550483     | -0.06831921     | 0.004586146  |
| A_01_P1803846 | LOC713120         | 1.7302823         | 0.8185466        | 1.7261277        | 0.82868516       | 1.27591044   | 0.5477071       | -0.78354067      | 9.54E-04         | -0.06395368     | -0.078293356 |
| A_01_P1822811 | A_01_P1822811     | -0.593785         | -0.58708614      | -1.1742738       | -1.376656        | -0.932950235 | 0.41227522      | -0.45772818      | 0.34358168       | -0.5730759      | 0.09937624   |
| A_01_P1745111 | ENSMUT00000026106 | -0.84214395       | -2.0777721       | No data availabl | -1.9388345       | -1.619583517 | No data availab | No data availabl | -0.14361417      | 0.1306034       | -0.14361417  |
| A_01_P000087  | GPR128            | 1.0820976         | 0.5428335        | 0.54107064       | No data availabl | 0.72200058   | No data availab | No data availabl | -0.057227258     | 0.055043574     | -0.057227258 |
| A_01_P1813486 | A_01_P1813486     | 0.8274738         | 1.9513443        | 1.0995634        | 1.0217445        | 1.2250315    | No data availab | 0.3503626        | -0.11987011      | -0.31321096     | 0.115246245  |
| A_01_P1799446 | ENSMUT00000011741 | 1.0331087         | No data availabl | 1.4709272        | No data availabl | 1.25201795   | No data availab | 0.29274794       | -0.06395539      | -0.28913778     | 0.114396275  |
| A_01_P1699446 | ENSMUT00000042972 | 0.6796883         | No data availabl | 0.8321757        | No data availabl | 0.755932     | 0.05899814      | No data availabl | -0.012185207     | -0.048907064    | 0.023406467  |
| A_01_P003524  | POU4F2            | No data available | -1.3068321       | No data availabl | -1.0662831       | -1.1865576   | No data availab | No data availabl | 0.15990227       | -0.1798601      | 0.15990227   |
| A_01_P1724286 | ENSMUT00000045695 | 0.79128873        | 0.73418546       | 1.3462527        | No data availabl | 0.957242297  | -0.009320719    | -0.29905203      | -0.10218242      | 0.33574703      | -0.136851723 |
| A_01_P1731336 | ENSMUT00000047336 | 1.8348397         | 0.7690924        | 1.8082005        | No data availabl | 1.470710867  | 0.66289705      | -1.2147781       | 0.14166859       | -0.17996998     | -0.136737487 |
| A_01_P1757131 | ENSMUT00000046741 | -0.8253655        | -2.1573386       | No data availabl | -2.0452678       | -1.675990633 | No data availab | -0.24401692      | -0.5444045       | 0.55575204      | -0.39421071  |
| A_01_P1706221 | HAS1              | -0.28184763       | -0.69699955      | -1.2635903       | -1.0411673       | -0.820901195 | -0.38132033     | 0.24167685       | 0.00197782       | 0.068364345     | -0.045888553 |
| A_01_P1746126 | ENPP3             | -1.2399803        | -1.2253811       | -0.71269935      | -0.8960358       | -1.018524138 | -0.48991254     | 0.5111108        | 0.25625318       | -0.58115834     | 0.092477813  |
| A_01_P1708976 | LOC709481         | 1.1661922         | No data availabl | 0.74217373       | 1.65958          | 1.18931531   | No data availab | No data availabl | 0.1553797        | -0.17415671     | 0.1553797    |
| A_01_P1762876 | ENSMUT00000041552 | -1.6182206        | -0.84740895      | -1.5907717       | No data availabl | -1.35213375  | -0.25299647     | 0.079877965      | -0.33949414      | 0.39352742      | -0.170870882 |
| A_01_P1826106 | LOC718414         | -1.160319         | -1.2241148       | -1.463119        | No data availabl | -1.2825176   | -0.62248665     | 0.37387168       | -0.21674974      | 0.25595018      | -0.15512157  |
| A_01_P1750041 | ATG14             | 0.5069828         | 1.0416311        | 1.5243319        | 1.3915168        | 1.11611565   | -0.0809342      | -0.3782611       | 0.50377226       | -0.20543995     | 0.014858987  |
| A_01_P1818781 | A_01_P1818781     | 1.4410468         | 0.6012198        | No data availabl | 0.8463046        | 0.962857067  | -0.31994775     | -0.12653561      | 0.35393304       | 0.006955212     | -0.030850107 |
